# Supplementary material for: Synergistic promotion of Ag nanoparticles supported on magnetic Cu based metal organic framework for A3-coupling and synthesis of benzopyranopyrimidines
Source: Royal Society of Chemistry journal article supplement (doi:10.1039/d3nj00066d), 2023-01-01
Supplement: d3nj00066d1.pdf [file d3nj00066d1.pdf]

## New Journal of Chemistry

### Supplementary data

#### **Synergistic promotion of Ag nanoparticles supported on magnetic Cu based metal organic framework for A<sup>3</sup>-coupling and synthesis of benzopyranopyrimidines**

Sukanya Sharma, Shally Sharma, Nitika Sharma, Vrinda Sharma and Satya Paul\*

*Department of Chemistry, University of Jammu, Jammu 180006, India.; Email:*

*satyapaul@jammuuniversity.ac.in.*

#### **List of contents**

#### **Page No.**

|                                                                                           |       |
|-------------------------------------------------------------------------------------------|-------|
| <b>S1.</b> Spectral data of synthesized compounds listed in Table 4.                      | 2-4   |
| <b>S2.</b> Spectral data of synthesized compounds listed in Table 7.                      | 4-7   |
| <b>S3.</b> <sup>1</sup> H and <sup>13</sup> C NMR spectra of compounds listed in Table 4. | 8-23  |
| <b>S4.</b> <sup>1</sup> H and <sup>13</sup> C NMR spectra of compounds listed in Table 7. | 24-37 |

## S1. Spectral data of the synthesized products 4(a-h)

### 1-(1,3-Diphenylprop-2-ynyl)piperidine (4a)

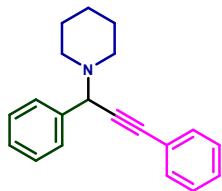

**<sup>1</sup>H NMR (400 MHz, CDCl<sub>3</sub>):** δ 7.66 (d, *J* = 7.5 Hz, 2H, ArH), 7.56-7.53 (m, 2H, ArH), 7.40-7.30 (m, 6H, ArH), 4.84 (s, 1H, CH), 2.60 (br, 4H, 2CH<sub>2</sub>), 1.68-1.57 (m, 4H, 2CH<sub>2</sub>), 1.48-1.45 (m, 2H, CH<sub>2</sub>); **<sup>13</sup>C NMR (100 MHz, CDCl<sub>3</sub>):** δ 138.40, 131.82, 128.62, 128.29, 128.08, 127.52, 123.30, 87.85, 86.00, 62.35, 50.61, 26.10, 24.40.

### 1-(3-Phenyl-1-p-tolylprop-2-ynyl)piperidine (4b)

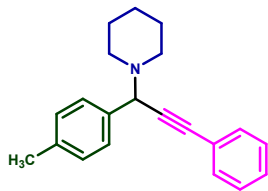

**<sup>1</sup>H NMR (400 MHz, CDCl<sub>3</sub>):** δ 7.54-7.52 (m, 4H, ArH), 7.35-7.33 (m, 3H, ArH), 7.19 (d, *J* = 7.9 Hz, 2H, ArH), 4.79 (s, 1H, CH), 2.58 (t, *J* = 4.6 Hz, 4H, 2CH<sub>2</sub>), 2.38 (s, 3H, CH<sub>3</sub>), 1.63-1.59 (m, 4H, 2CH<sub>2</sub>), 1.47-1.44 (m, 2H, CH<sub>2</sub>); **<sup>13</sup>C NMR (100 MHz, CDCl<sub>3</sub>):** δ 137.18, 135.48, 131.80, 128.77, 128.55, 128.26, 127.97, 123.37, 87.63, 86.28, 62.06, 50.62, 26.09, 24.41, 21.13.

### 1-(3-Phenyl-1-m-tolylprop-2-ynyl)piperidine (4c)

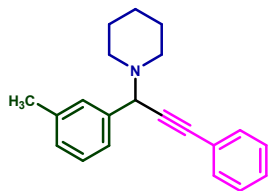

**<sup>1</sup>H NMR (400 MHz, CDCl<sub>3</sub>):** δ 7.56-7.52 (m, 2H), 7.45 (d, *J* = 1.7 Hz, 2H), 7.38-7.34 (m, 3H), 7.26 (d, *J* = 7.9 Hz, 1H), 7.13 (d, *J* = 7.5 Hz, 1H), 4.77 (s, 1H), 2.60-2.58 (m, 4H), 2.40 (s, 3H), 1.67-1.56 (m, 4H), 1.47 (dt, *J* = 8.8, 4.6 Hz, 2H); **<sup>13</sup>C NMR (100 MHz, CDCl<sub>3</sub>):** δ 138.29, 137.70, 131.82, 129.29, 128.45, 128.27, 128.05, 127.95, 125.74, 123.36, 87.73, 86.21, 62.41, 50.78, 26.09, 24.40, 21.54.

### 1-(4-Methoxyphenyl)-3-phenylprop-2-ynyl)piperidine (4d)

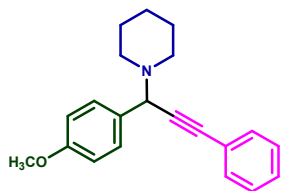

$^1\text{H NMR}$  (400 MHz,  $\text{CDCl}_3$ ):  $\delta$  7.60-7.56 (m, 4H, ArH), 7.39-7.35 (m, 3H, ArH), 6.94 (d,  $J = 8.6$  Hz, 2H, ArH), 4.79 (s, 1H, CH), 3.84 (s, 3H,  $\text{OCH}_3$ ), 2.60 (br, 4H,  $2\text{CH}_2$ ), 1.69-1.58 (m, 4H,  $2\text{CH}_2$ ), 1.50-1.47 (m, 2H,  $\text{CH}_2$ );  $^{13}\text{C NMR}$  (100 MHz,  $\text{CDCl}_3$ ):  $\delta$  159.02, 131.83, 130.73, 129.69, 128.31, 128.05, 123.43, 113.42, 87.67, 86.47, 61.82, 55.27, 50.64, 26.23, 24.54.

### 1-(4-Bromophenyl)-3-phenylprop-2-ynyl)piperidine (4e)

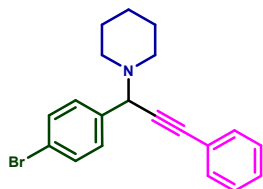

$^1\text{H NMR}$  (400 MHz,  $\text{CDCl}_3$ ):  $\delta$  7.57-7.50 (m, 6H, ArH), 7.37-7.36 (m, 3H, ArH), 4.78 (s, 1H, CH), 2.57 (br, 4H,  $2\text{CH}_2$ ), 1.68-1.56 (m, 4H,  $2\text{CH}_2$ ), 1.49-1.48 (m, 2H,  $\text{CH}_2$ );  $^{13}\text{C NMR}$  (100 MHz,  $\text{CDCl}_3$ ):  $\delta$  137.81, 131.83, 131.18, 130.23, 128.35, 128.25, 123.07, 121.41, 88.29, 85.28, 61.78, 50.71, 26.15, 24.38.

### 1-(4-Chlorophenyl)-3-phenylprop-2-ynyl)piperidine (4f)

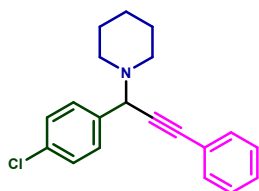

$^1\text{H NMR}$  (400 MHz,  $\text{CDCl}_3$ ):  $\delta$  7.61 (d,  $J = 8.4$  Hz, 2H, ArH), 7.55-7.53 (m, 2H, ArH), 7.37-7.34 (m, 5H, ArH), 4.79 (s, 1H, CH), 2.56 (t,  $J = 4.7$  Hz, 4H,  $2\text{CH}_2$ ), 1.65-1.58 (m, 4H,  $2\text{CH}_2$ ), 1.48-1.45 (m, 2H,  $\text{CH}_2$ );  $^{13}\text{C NMR}$  (100 MHz,  $\text{CDCl}_3$ ):  $\delta$  137.32, 133.19, 131.82, 130.93, 129.83, 128.33, 128.20, 123.10, 88.24, 85.39, 61.73, 50.73, 26.16, 24.39.

#### 4-(1,3-Diphenylprop-2-ynyl)morpholine (4g)

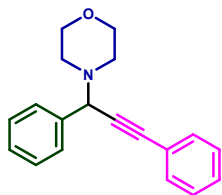

**<sup>1</sup>H NMR (400 MHz, CDCl<sub>3</sub>):** δ 7.68 (d, *J* = 7.3 Hz, 2H, ArH), 7.58-7.55 (m, 2H, ArH), 7.43-7.33 (m, 6H, ArH), 4.84 (s, 1H, CH), 3.82-3.73 (m, 4H, 2CH<sub>2</sub>), 2.68 (br, 4H, 2CH<sub>2</sub>); **<sup>13</sup>C NMR (100 MHz, CDCl<sub>3</sub>):** δ 137.84, 131.85, 128.63, 128.36, 128.30, 128.27, 127.82, 123.01, 88.53, 85.08, 67.20, 62.07, 49.91.

#### 4-(1-(4-bromophenyl)-3-phenylprop-2-ynyl)morpholine (4h)

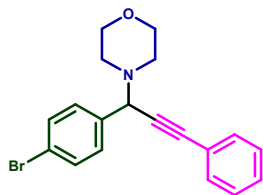

**<sup>1</sup>H NMR (400 MHz, CDCl<sub>3</sub>):** δ 7.56-7.50 (m, 6H), 7.38-7.35 (m, 3H), 4.77 (s, 1H), 3.80-3.71 (m, 4H), 2.64 (t, *J* = 4.4 Hz, 4H); **<sup>13</sup>C NMR (100 MHz, CDCl<sub>3</sub>):** δ 136.96, 131.81, 131.35, 130.26, 128.44, 128.37, 122.67, 121.75, 88.93, 84.23, 67.11, 61.42, 49.77.

## S2. Spectral data of the synthesized products 8(a-g)

#### 2-(4-(piperidin-1-yl)-5H-chromeno[2,3-d]pyrimidin-2-yl)phenol (8a)

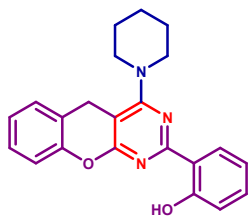

**<sup>1</sup>H NMR (400 MHz, CDCl<sub>3</sub>):** δ 13.49 (brs, 1H, OH), 8.45 (dd, *J* = 8.0, 1.6 Hz, 1H), 7.40-7.35 (m, 1H, Ar), 7.23 (dd, *J* = 8.9, 8.0 Hz, 3H, Ar), 7.15-7.13 (m, 1H, Ar), 7.00 (d, 1H, *J* = 8 Hz, Ar), 6.96-6.92 (m, 1H), 3.95 (s, 2H, CH<sub>2</sub>), 3.48-3.45 [m, 4H, N(CH<sub>2</sub>)<sub>2</sub>], 1.81-1.76 (m, 6H, 3CH<sub>2</sub>); **<sup>13</sup>C**

**NMR (100 MHz, CDCl<sub>3</sub>):**  $\delta$  165.38, 164.50, 162.08, 160.44, 150.71, 132.84, 129.22, 128.54, 128.22, 124.40, 119.59, 118.84, 118.61, 117.55, 117.13, 97.62, 49.55, 25.99, 25.65, 24.36.

**2-(4-morpholino-5H-chromeno[2,3-d]pyrimidin-2-yl)phenol (8b)**

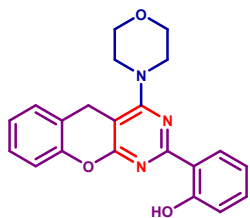

**<sup>1</sup>H NMR (400 MHz, CDCl<sub>3</sub>):**  $\delta$  13.12 (brs, 1H, OH), 8.39 (d,  $J$  = 7.9 Hz, 1H, Ar), 7.35 (t,  $J$  = 7.7 Hz, 1H, Ar), 7.25-7.17 (m, 3H, Ar), 7.11 (t,  $J$  = 7.2 Hz, 1H, Ar), 6.97 (d,  $J$  = 8.2 Hz, 1H, Ar), 6.91 (t,  $J$  = 6.8 Hz, 1H, Ar), 3.93-3.90 (m, 6H), 3.50 (s, 4H, 2CH<sub>2</sub>); **<sup>13</sup>C NMR (100 MHz, CDCl<sub>3</sub>):**  $\delta$  164.84, 164.34, 162.16, 160.34, 150.42, 133.01, 129.19, 128.57, 128.37, 124.63, 119.09, 118.93, 118.43, 117.62, 117.11, 97.83, 66.74, 48.67, 25.93.

**4-bromo-2-(7-bromo-4-piperidin-1-yl)-5H-chromeno[2,3-d]pyrimidin-2-yl)phenol (8c)**

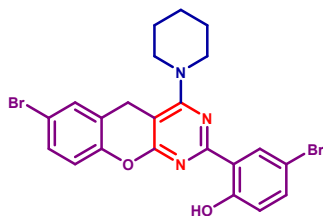

**<sup>1</sup>H NMR (400 MHz, CDCl<sub>3</sub>):**  $\delta$  13.39 (brs, 1H, OH), 8.52 (d,  $J$  = 8.0 Hz, 1H, Ar), 7.43 (dd,  $J$  = 8.7, 2.5 Hz, 1H, Ar), 7.38 (d,  $J$  = 8.1 Hz, 2H, Ar), 7.10 (d,  $J$  = 8.3 Hz, 1H, Ar), 6.88 (d,  $J$  = 8.7 Hz, 1H, Ar), 3.92 (s, 2H), 3.46 (t,  $J$  = 13.9 Hz, 4H), 1.78 (s, 6H); **<sup>13</sup>C NMR (100 MHz, CDCl<sub>3</sub>):**  $\delta$  165.18, 164.07, 160.97, 159.50, 149.73, 135.55, 131.33, 131.30, 131.26, 121.59, 120.08, 119.55, 118.92, 116.95, 111.02, 97.25, 49.54, 25.91, 25.50, 24.27.

**4-bromo-2-(7-bromo-4-morpholino-5H-chromeno[2,3-d]pyrimidin-2-yl)phenol (8d)**

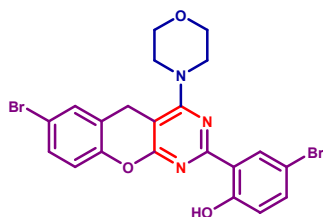

**<sup>1</sup>H NMR (400 MHz, CDCl<sub>3</sub>):**  $\delta$  13.03 (brs, 1H, OH), 8.46 (d,  $J$  = 7.9 Hz, 1H, Ar), 7.43-7.37 (m, 3H, Ar), 7.07 (d,  $J$  = 8.3 Hz, 1H, Ar), 6.85 (d,  $J$  = 8.8 Hz, 1H, Ar), 3.94-3.89 (m, 6H), 3.51 (t,  $J$  = 4 Hz, 2H, CH<sub>2</sub>); **<sup>13</sup>C NMR (100 MHz, CDCl<sub>3</sub>):**  $\delta$  164.80, 163.66, 161.06, 159.43, 149.35, 135.72, 131.94, 131.47, 131.38, 131.30, 121.02, 119.66, 118.82, 117.08, 110.96, 97.51, 66.74, 48.65, 25.26.

**4-bromo-2-(7-bromo-4-(pyrrolidin-1-yl)-5H-chromeno[2,3-d]pyrimidin-2-yl)phenol (8e)**

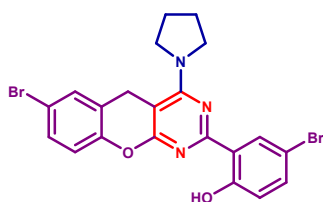

**<sup>1</sup>H NMR (400 MHz, CDCl<sub>3</sub>):**  $\delta$  13.64 (brs, 1H, OH), 8.52 (d,  $J$  = 8.0 Hz, 1H, Ar), 7.42 (dd,  $J$  = 8.7, 2.2 Hz, 1H, Ar), 7.36 (d,  $J$  = 9.0 Hz, 1H, Ar), 7.33 (s, 1H, Ar), 7.07 (d,  $J$  = 8.6 Hz, 1H, Ar), 6.86 (d,  $J$  = 8.7 Hz, 1H, Ar), 4.26 (s, 2H, CH<sub>2</sub>), 3.84 (t,  $J$  = 6.0 Hz, 4H), 1.28 (t,  $J$  = 7.1 Hz, 4H); **<sup>13</sup>C NMR (100 MHz, CDCl<sub>3</sub>):**  $\delta$  161.24, 160.80, 160.32, 159.57, 149.27, 135.34, 131.34, 131.30, 130.87, 121.25, 120.14, 119.43, 118.76, 116.54, 110.88, 91.44, 60.73, 50.01, 25.63.

**4-nitro-2-(7-nitro-4-morpholino-5H-chromeno[2,3-d]pyrimidin-2-yl)phenol (8f)**

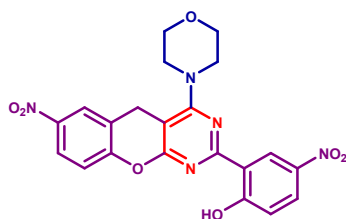

**<sup>1</sup>H NMR (400 MHz, CDCl<sub>3</sub>):** δ 13.82 (brs, 1H, OH), 9.32 (d, *J* = 8.0 Hz, 1H, Ar), 8.28 (dd, *J* = 9.2, 2.8 Hz, 1H), 8.23 (d, *J* = 7.6 Hz, 2H), 7.36 (d, *J* = 9.8 Hz, 1H), 7.15-7.12 (m, 1H), 4.11 (s, 2H), 3.97 (t, *J* = 4 Hz, 4H), 3.63 (s, 4H); **<sup>13</sup>C NMR (100 MHz, CDCl<sub>3</sub>):** δ 165.99, 156.64, 155.31, 155.13, 154.77, 144.48, 140.32, 128.45, 128.33, 125.89, 124.69, 124.61, 120.13, 118.73, 118.14, 105.46, 66.76, 48.67, 25.93.

**4-nitro-2-(7-nitro-4-(pyrrolidin-1-yl)-5H-chromeno[2,3-d]pyrimidin-2-yl)phenol (8g)**

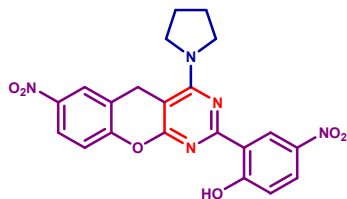

**<sup>1</sup>H NMR (400 MHz, CDCl<sub>3</sub>):** δ 14.43 (brs, 1H, OH), 9.33 (s, 1H, Ar), 8.25 (d, *J* = 7.8 Hz, 1H, Ar), 8.20-8.16 (m, 2H, Ar), 6.93 (d, *J* = 8 Hz, 1H, Ar), 7.05 (d, *J* = 9.1 Hz, 1H), 4.42 (s, 2H), 3.92 (s, 4H), 1.28 (s, 4H); **<sup>13</sup>C NMR (100 MHz, CDCl<sub>3</sub>):** δ 166.01, 157.08, 155.86, 155.64, 153.51, 142.26, 140.31, 127.92, 125.81, 124.77, 124.43, 118.41, 117.87, 111.63, 60.71, 50.33, 25.64.

S3.  $^1\text{H}$  and  $^{13}\text{C}$  NMR spectra of compounds listed in Table 4.

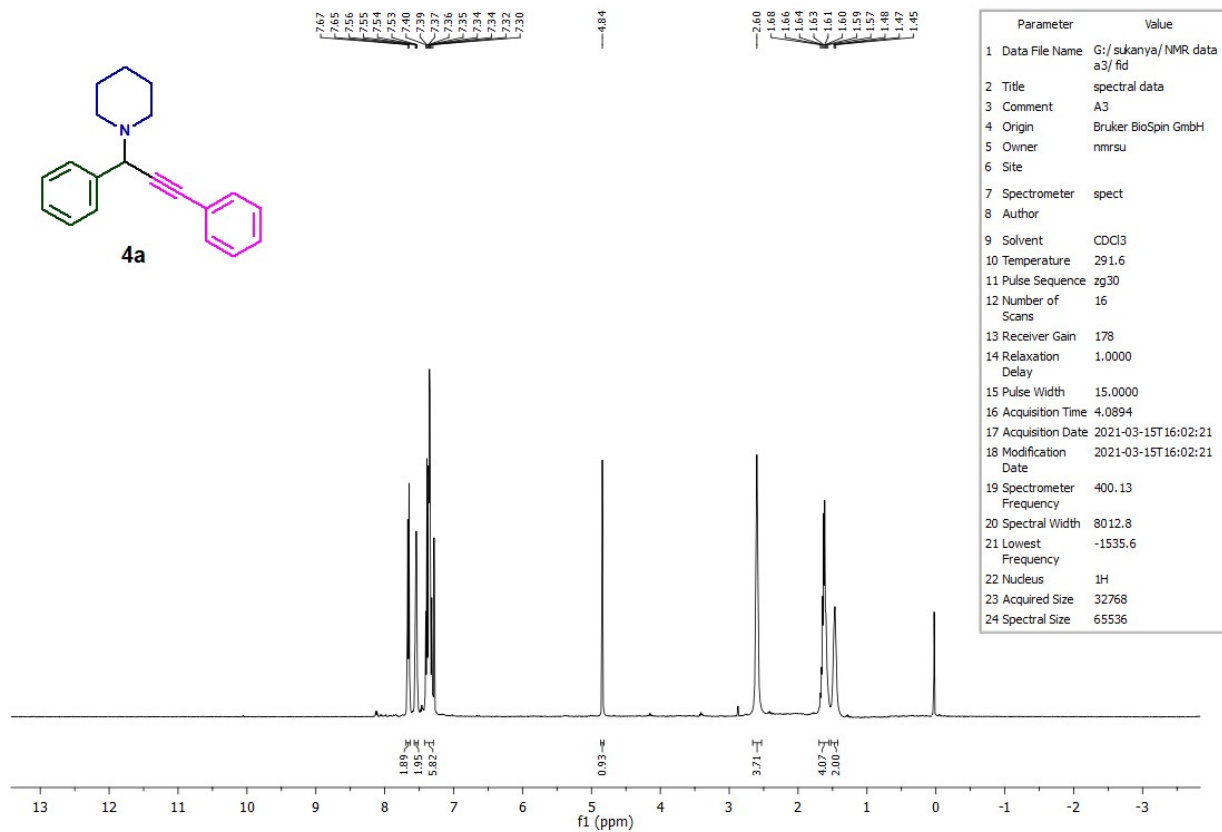

$^1\text{H}$  NMR spectra of product (4a)



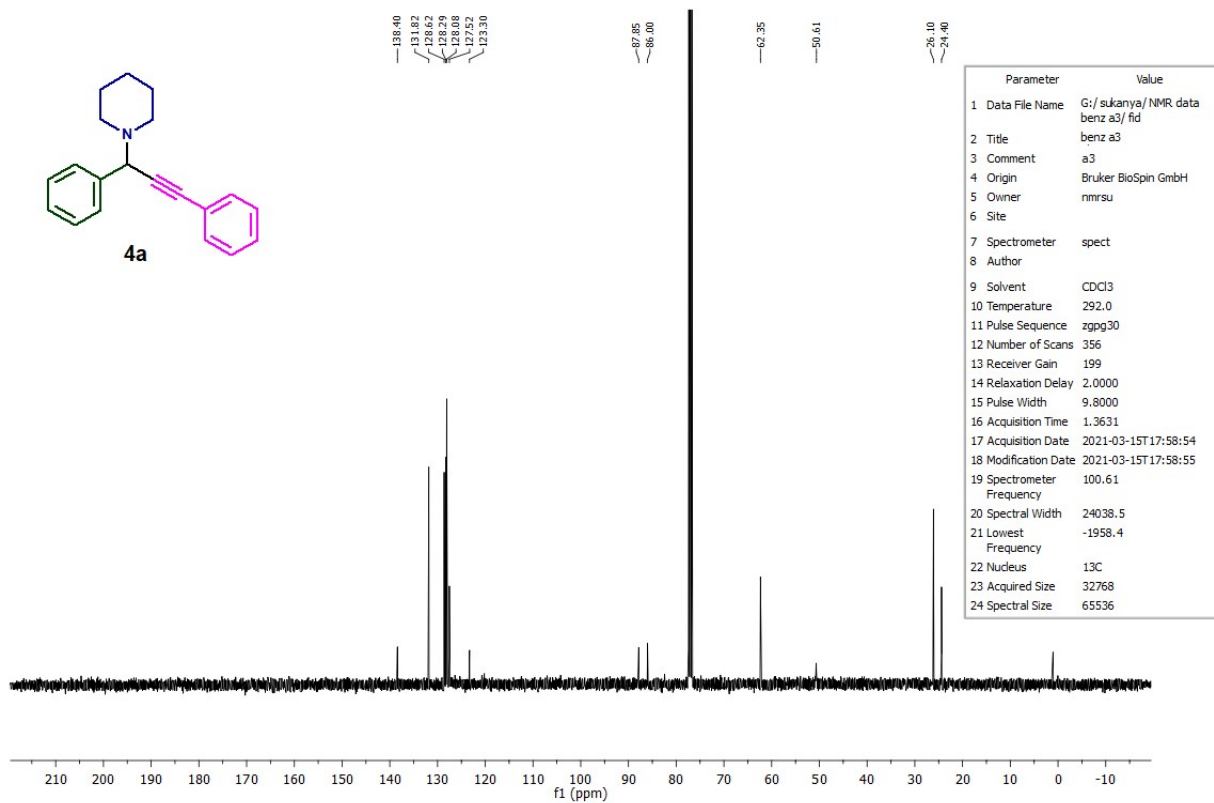

**<sup>13</sup>C NMR spectra of product (4a)**

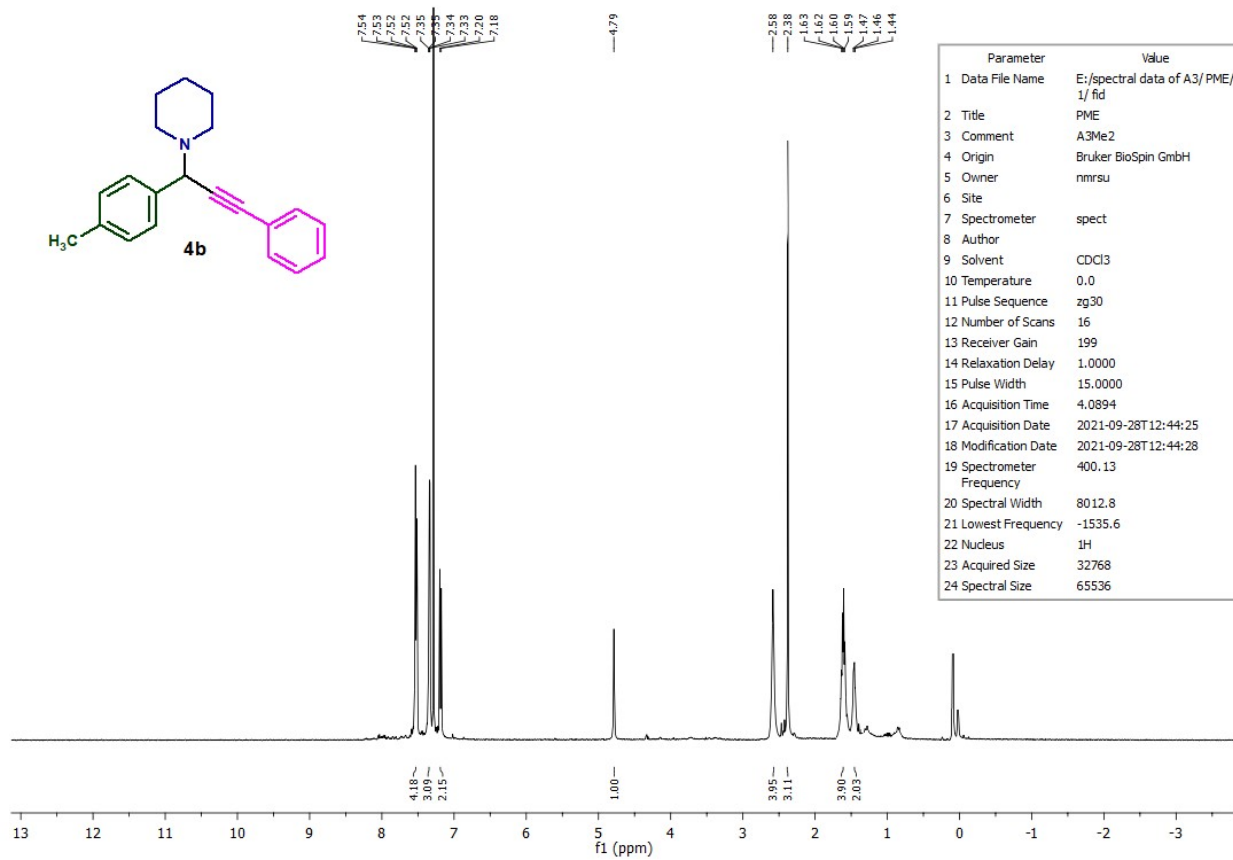

**<sup>1</sup>H NMR spectra of product (4b)**

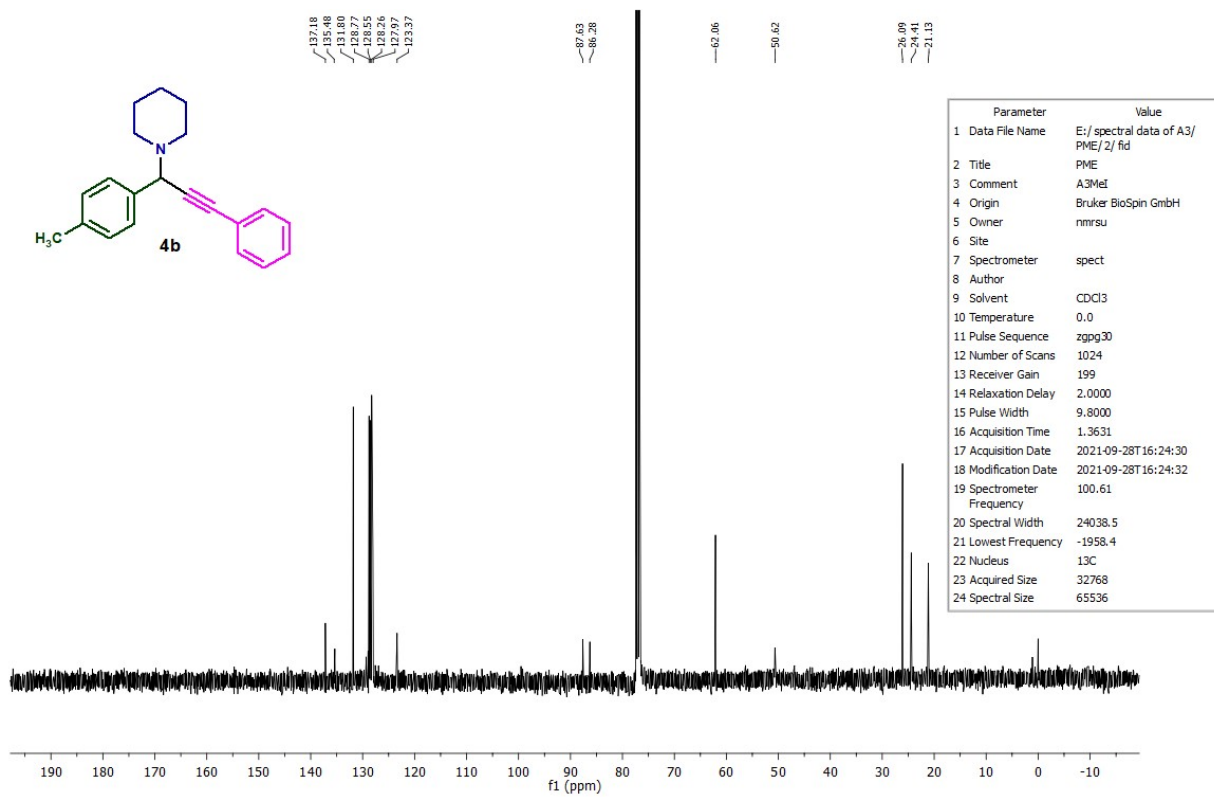

**<sup>13</sup>C NMR spectra of product (4b)**

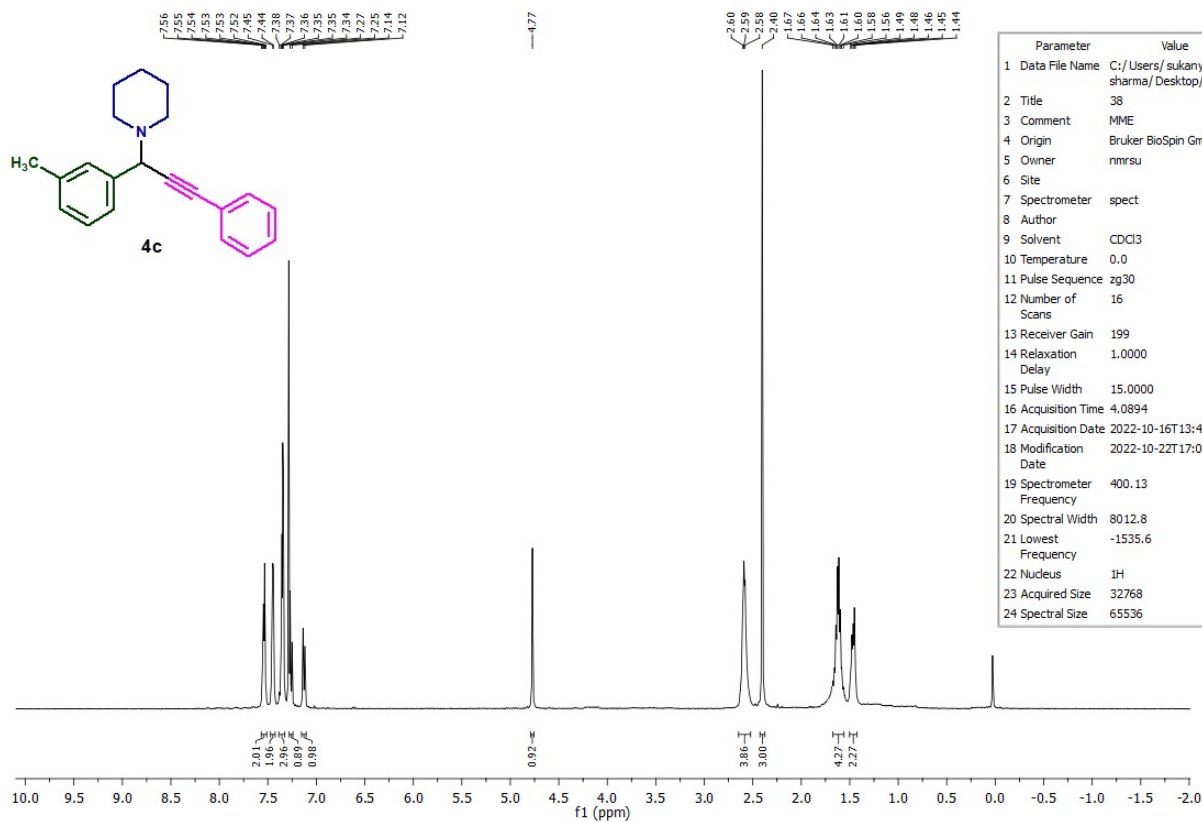

| Parameter                 | Value                                   |
|---------------------------|-----------------------------------------|
| 1 Data File Name          | C:/Users/sukanya sharma/Desktop/38/ fid |
| 2 Title                   | 38                                      |
| 3 Comment                 | MME                                     |
| 4 Origin                  | Bruker BioSpin GmbH                     |
| 5 Owner                   | nmsu                                    |
| 6 Site                    |                                         |
| 7 Spectrometer            | spect                                   |
| 8 Author                  |                                         |
| 9 Solvent                 | CDCl3                                   |
| 10 Temperature            | 0.0                                     |
| 11 Pulse Sequence         | zg30                                    |
| 12 Number of Scans        | 16                                      |
| 13 Receiver Gain          | 199                                     |
| 14 Relaxation Delay       | 1.0000                                  |
| 15 Pulse Width            | 15.0000                                 |
| 16 Acquisition Time       | 4.0894                                  |
| 17 Acquisition Date       | 2022-10-16T13:49:56                     |
| 18 Modification Date      | 2022-10-22T17:00:55                     |
| 19 Spectrometer Frequency | 400.13                                  |
| 20 Spectral Width         | 8012.8                                  |
| 21 Lowest Frequency       | -1535.6                                 |
| 22 Nucleus                | $^1\text{H}$                            |
| 23 Acquired Size          | 32768                                   |
| 24 Spectral Size          | 65536                                   |

**$^1\text{H}$  NMR spectra of product (4c)**

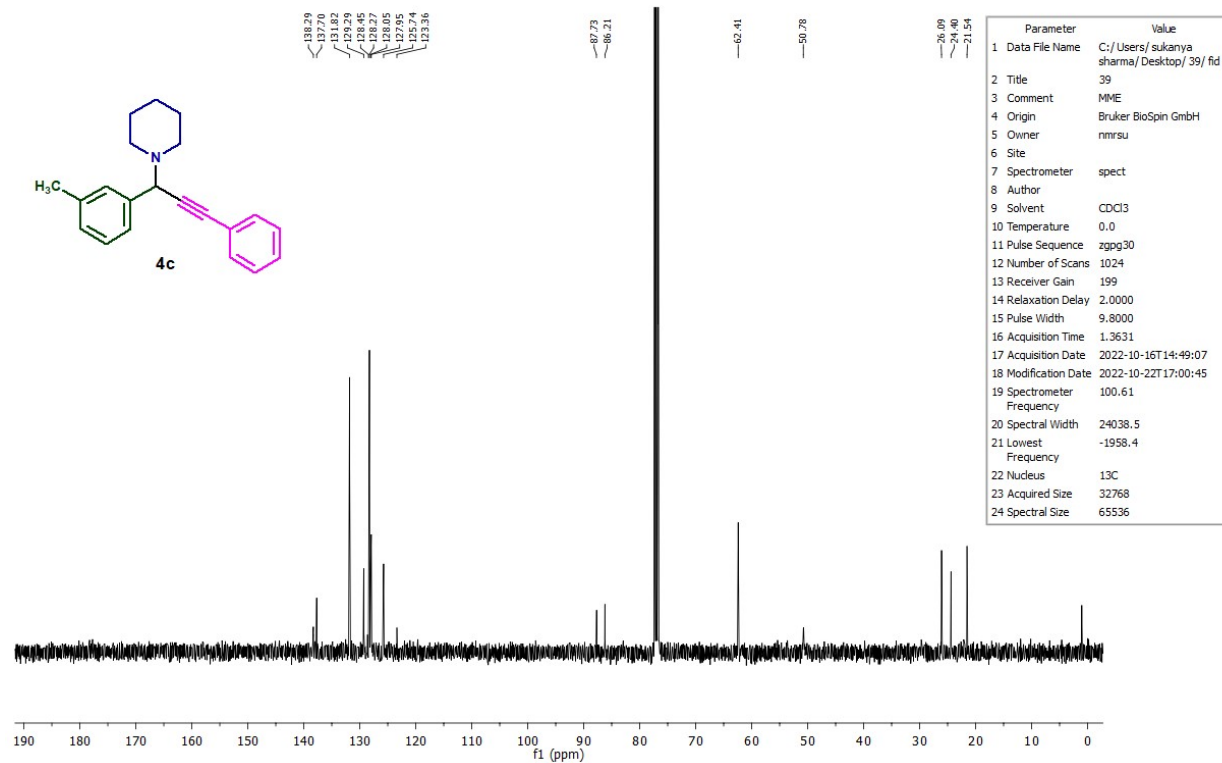

**<sup>13</sup>C NMR spectra of product (4c)**

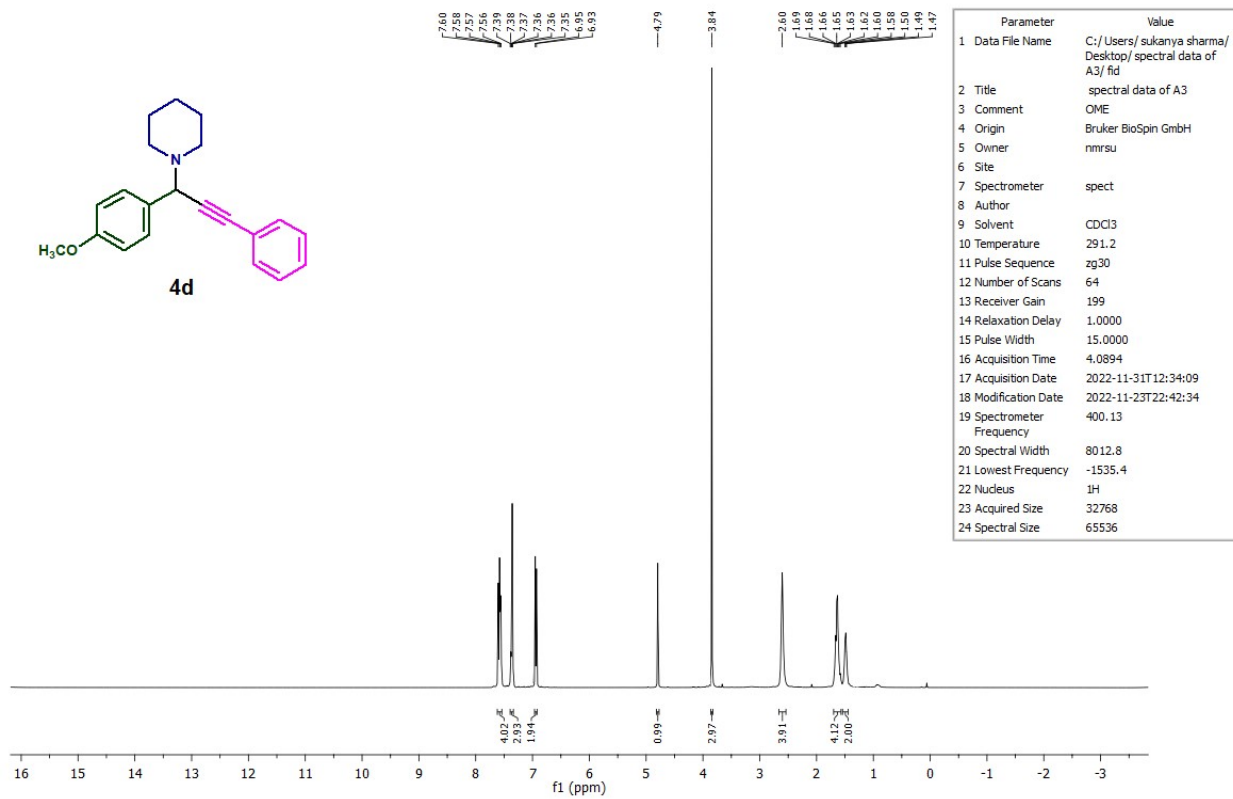

**<sup>1</sup>H NMR spectra of product (4d)**

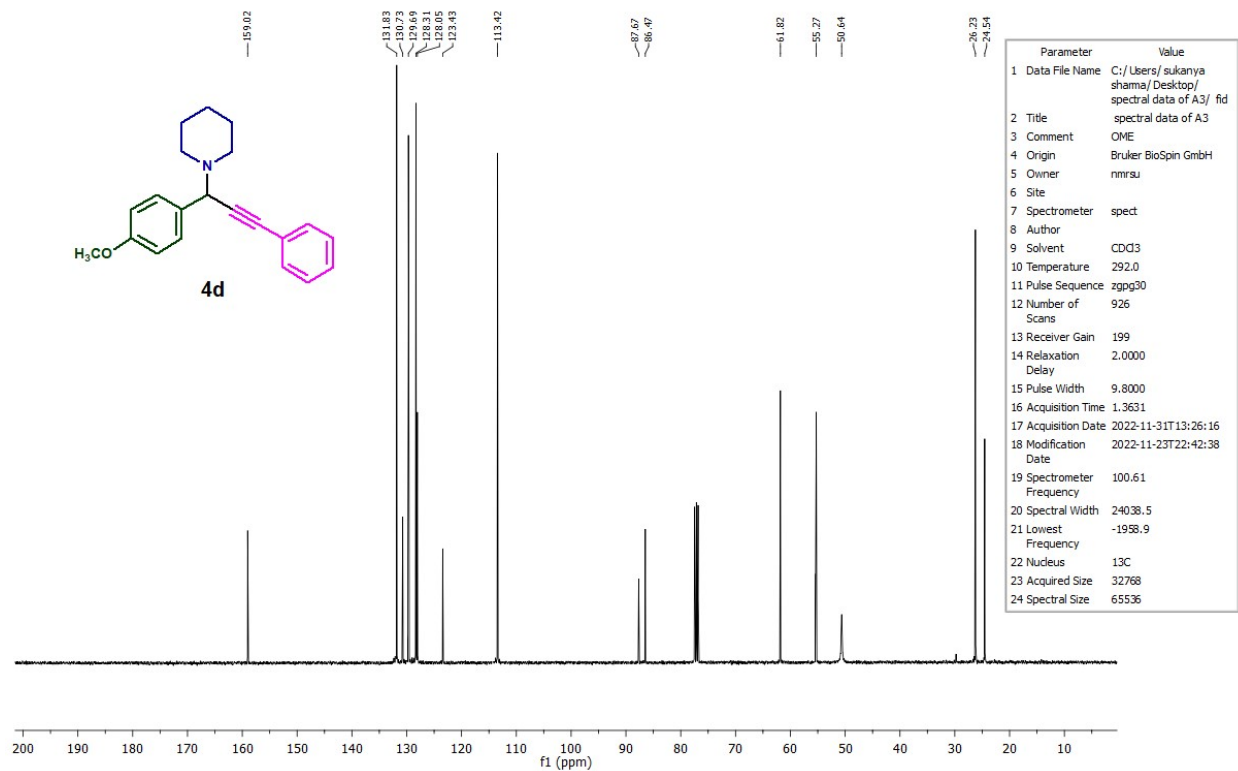

**<sup>13</sup>C NMR spectra of product (4d)**

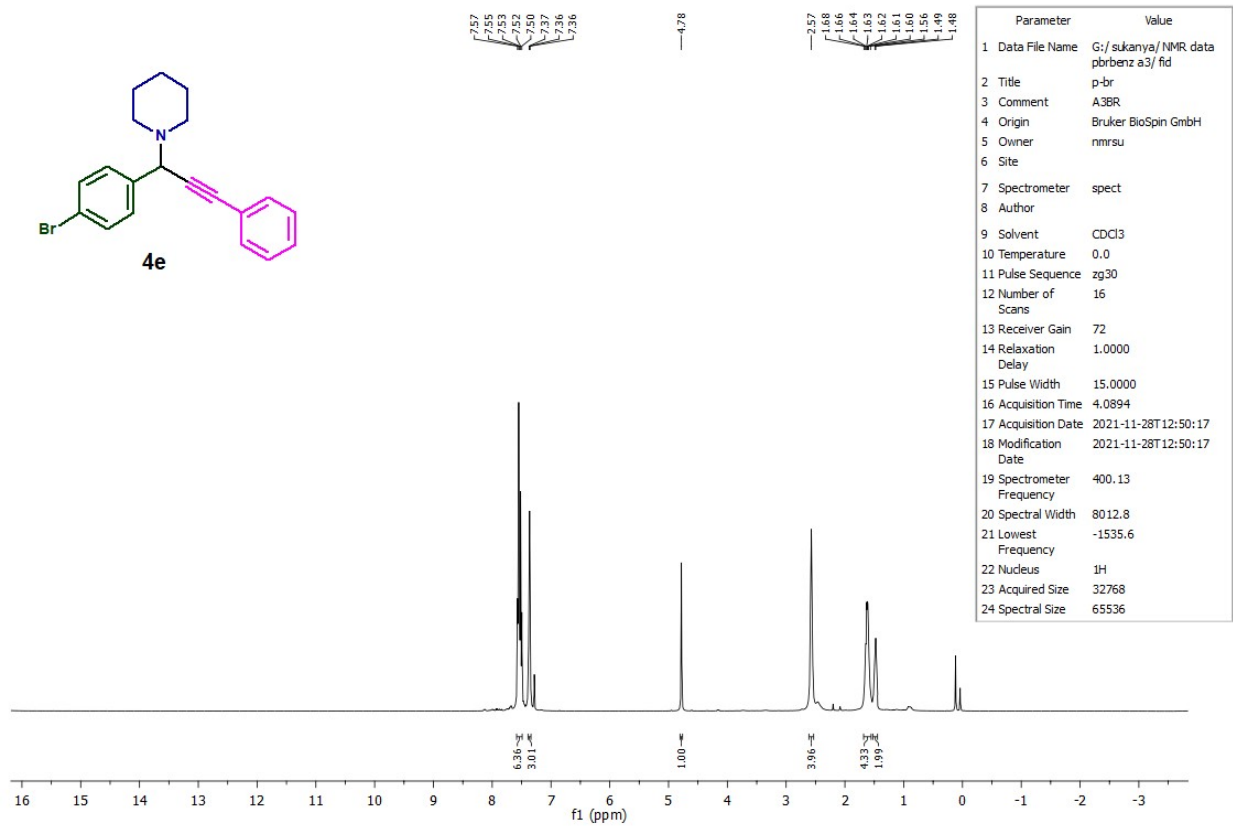

**<sup>1</sup>H NMR spectra of product (4e)**



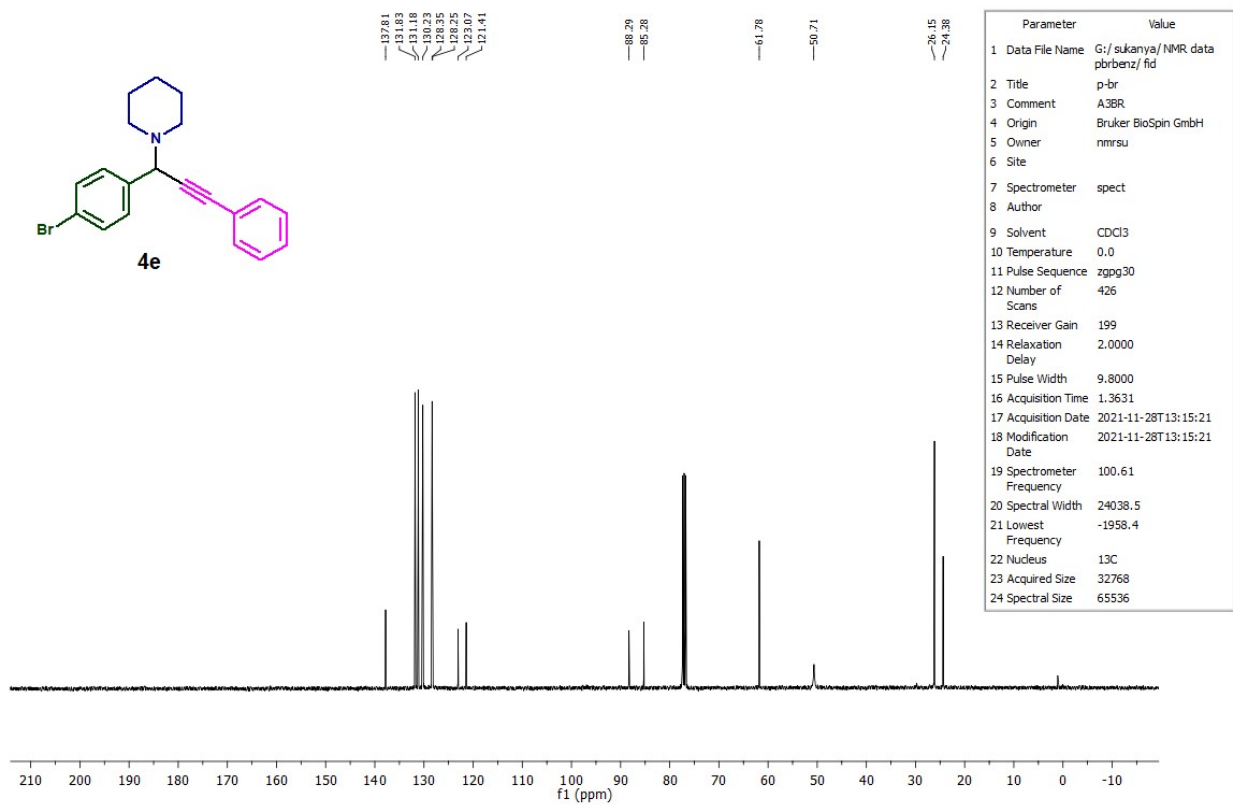

**<sup>13</sup>C NMR spectra of product (4e)**

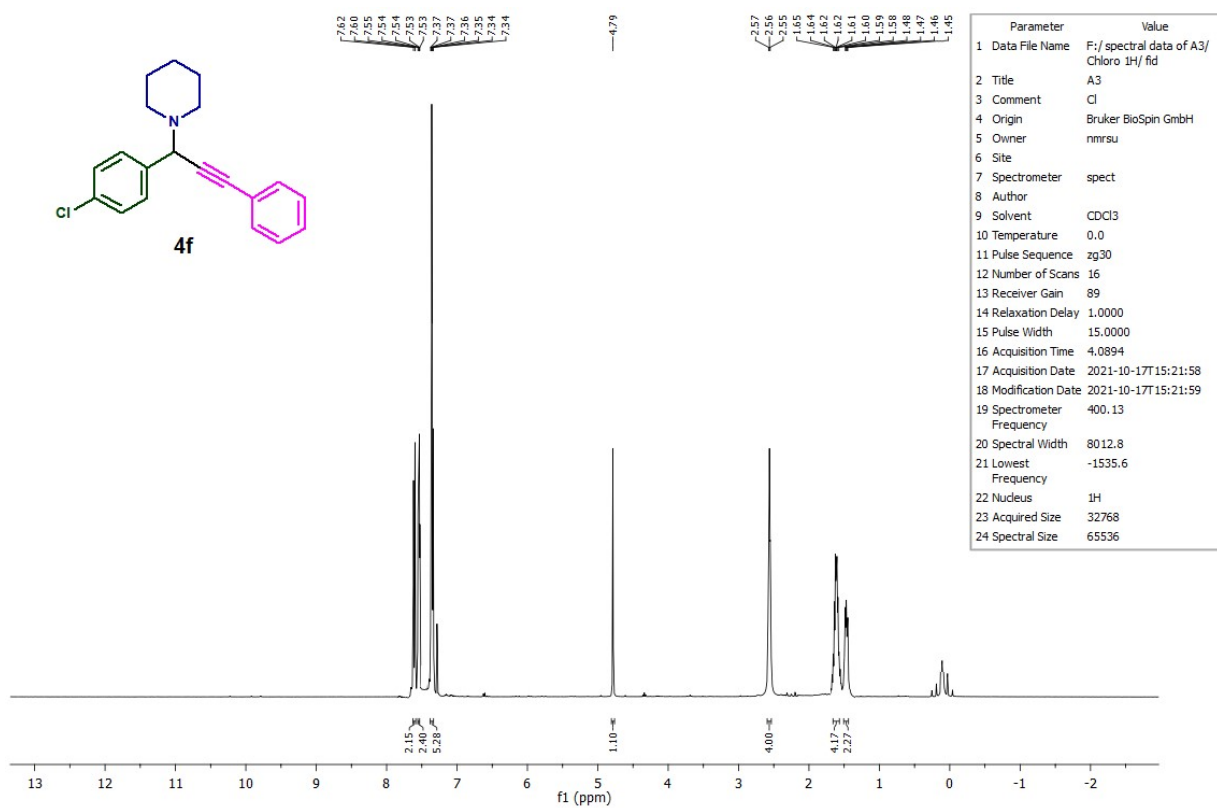

**<sup>1</sup>H NMR spectra of product (4f)**

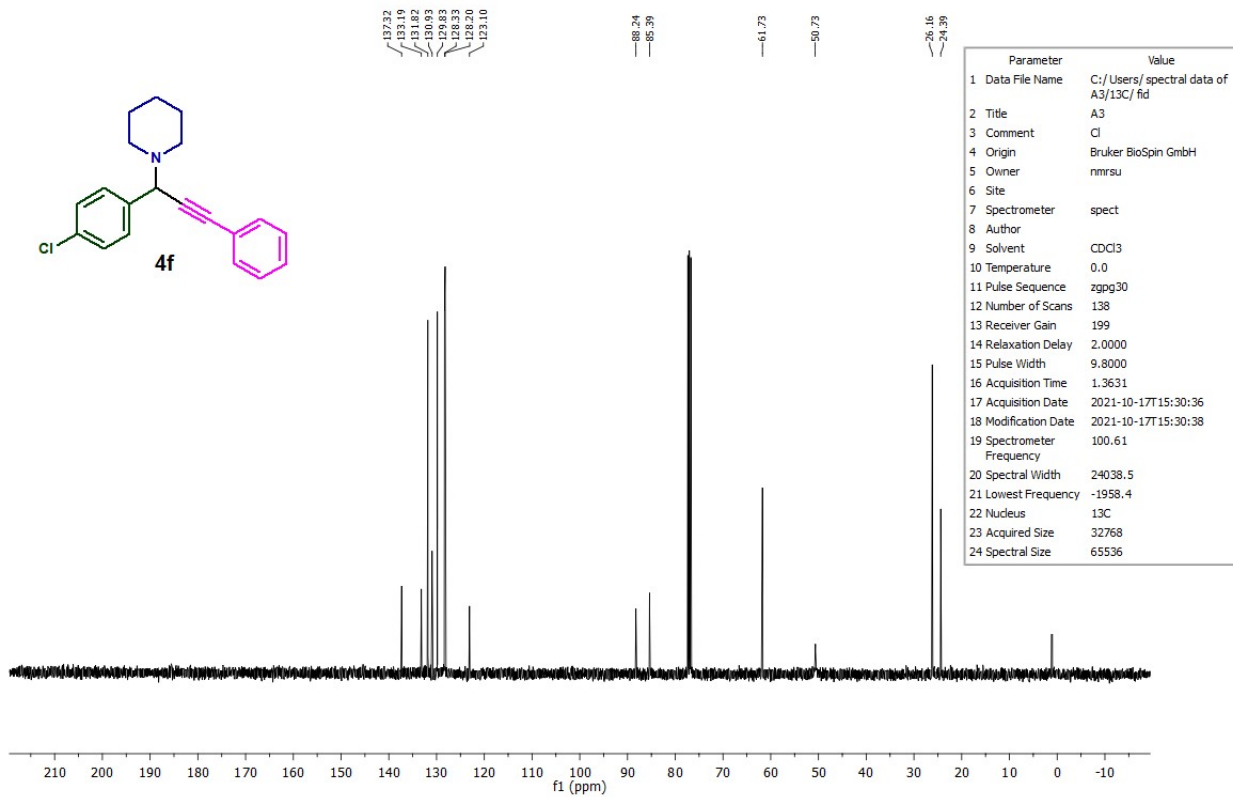

**<sup>13</sup>C NMR spectra of product (4f)**

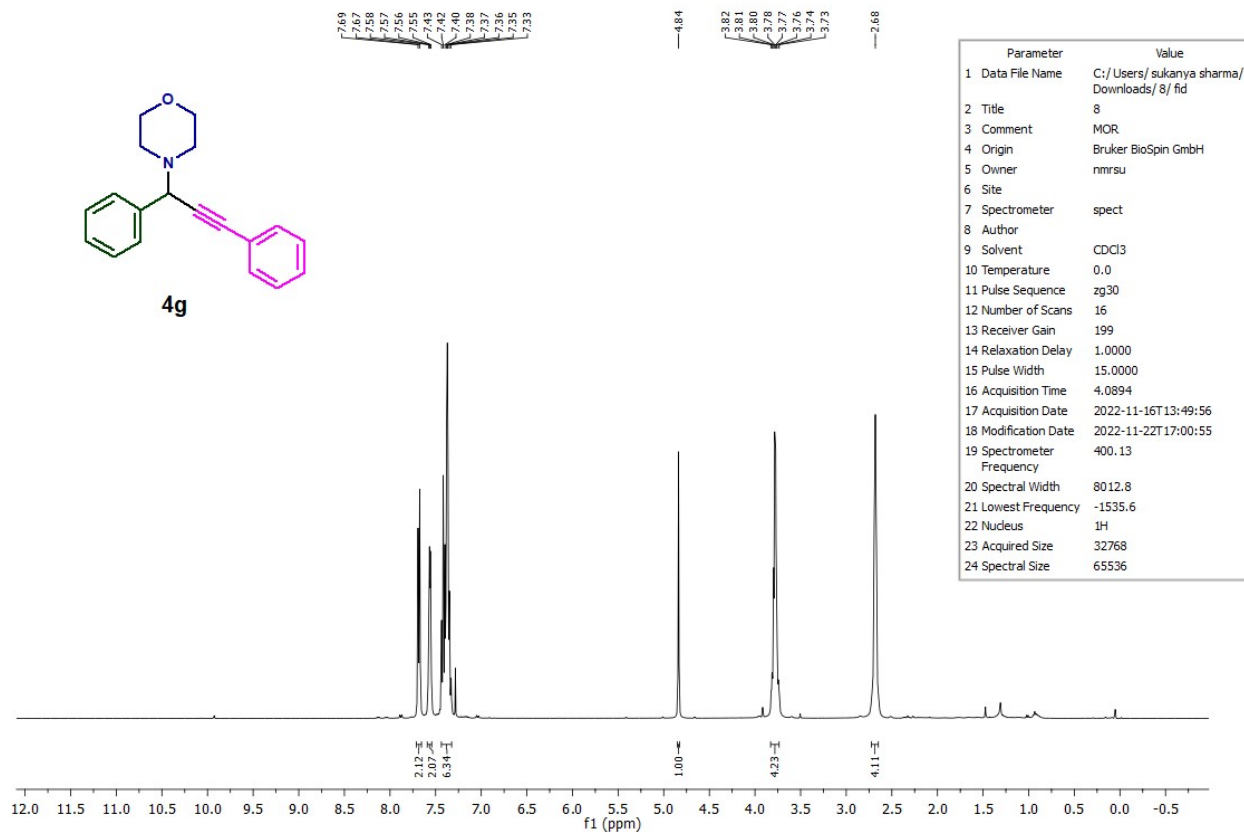

**$^1\text{H}$  NMR spectra of product (4g)**

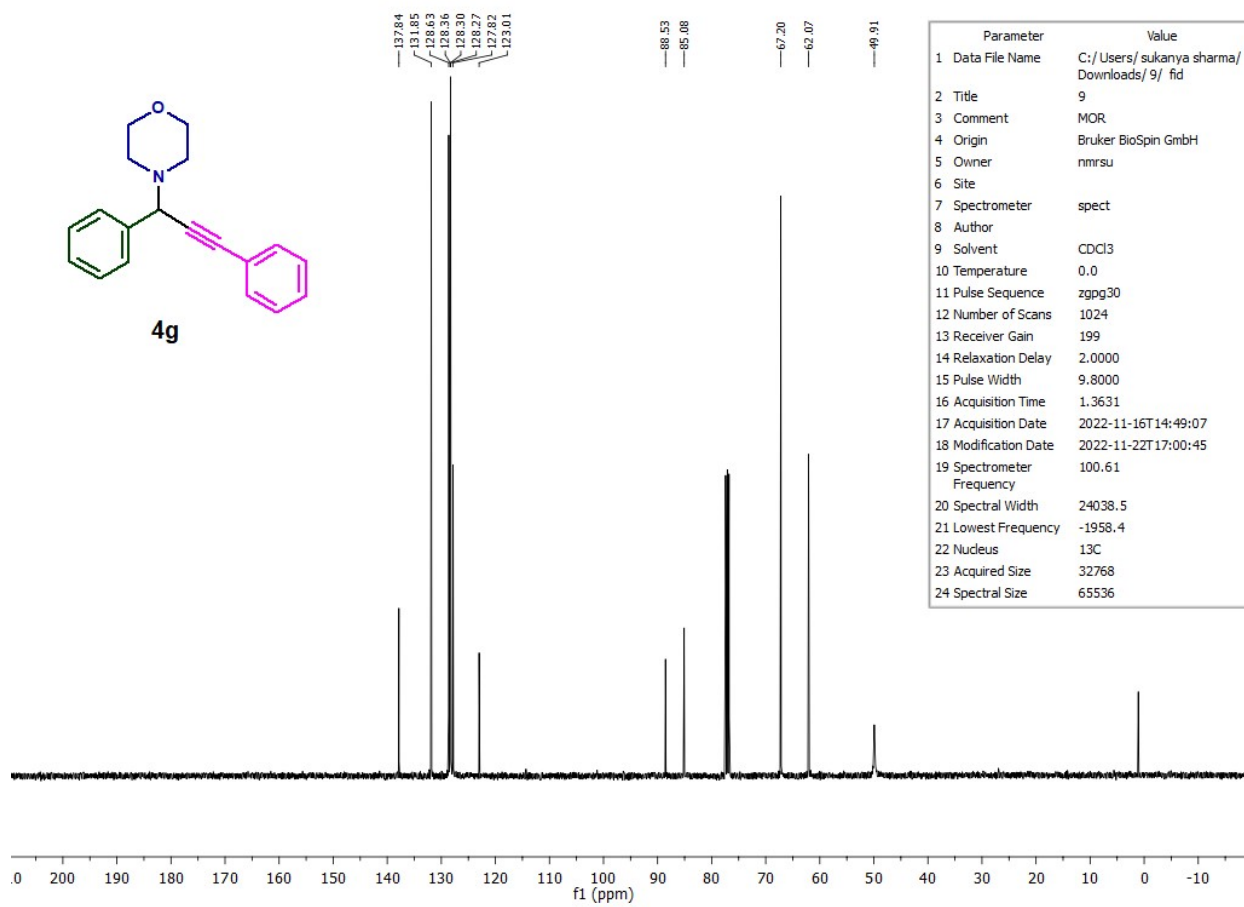

**<sup>13</sup>C NMR spectra of product (4g)**

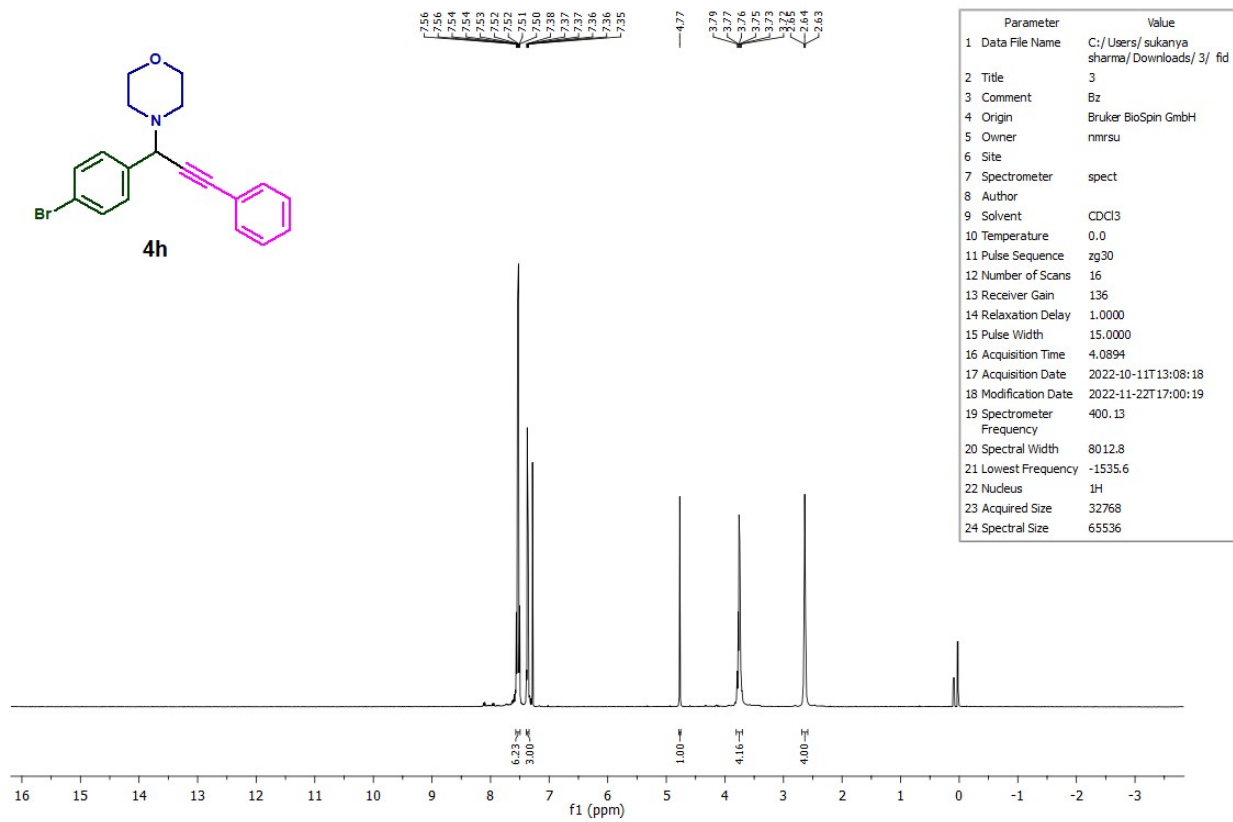

**<sup>1</sup>H NMR spectra of product (4h)**

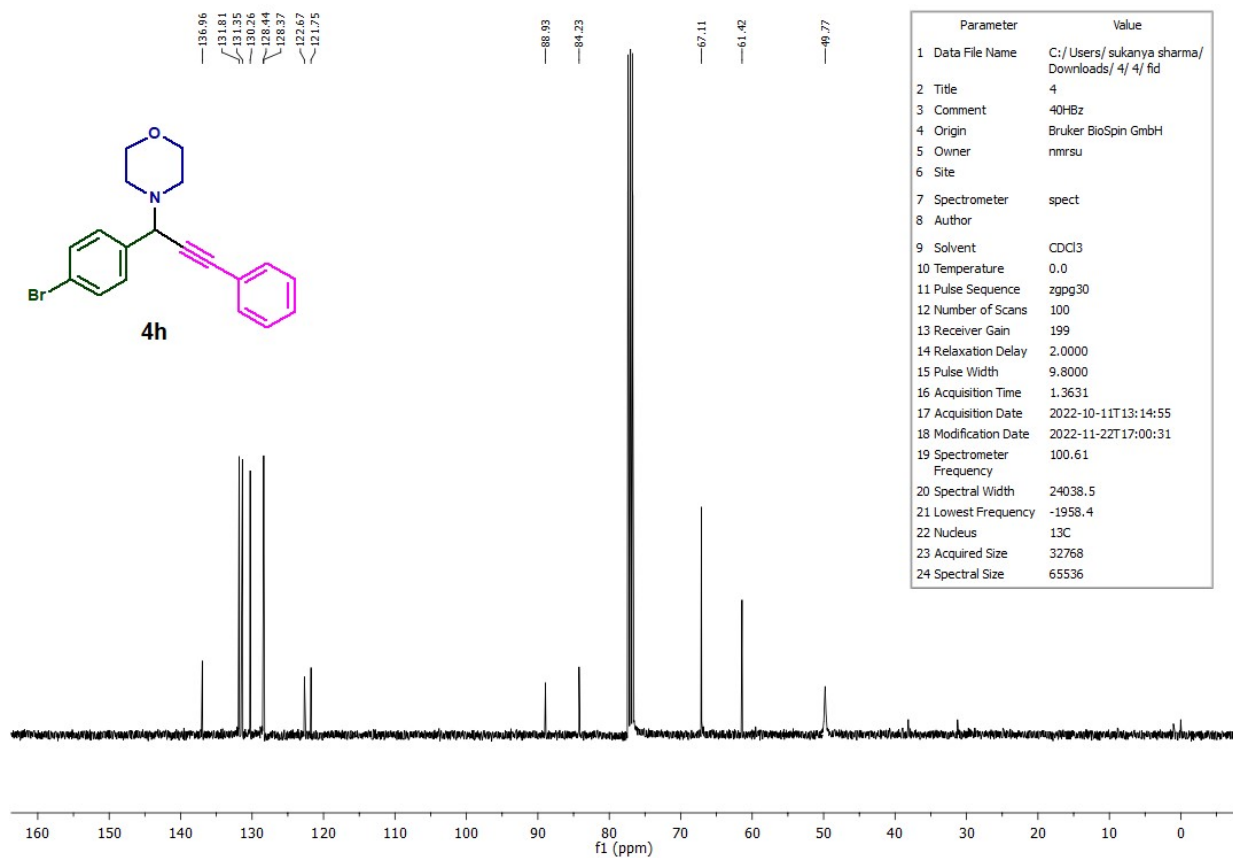

<sup>13</sup>C NMR spectra of product (4h)

### S4. <sup>1</sup>H and <sup>13</sup>C NMR spectra of compounds listed in Table 7

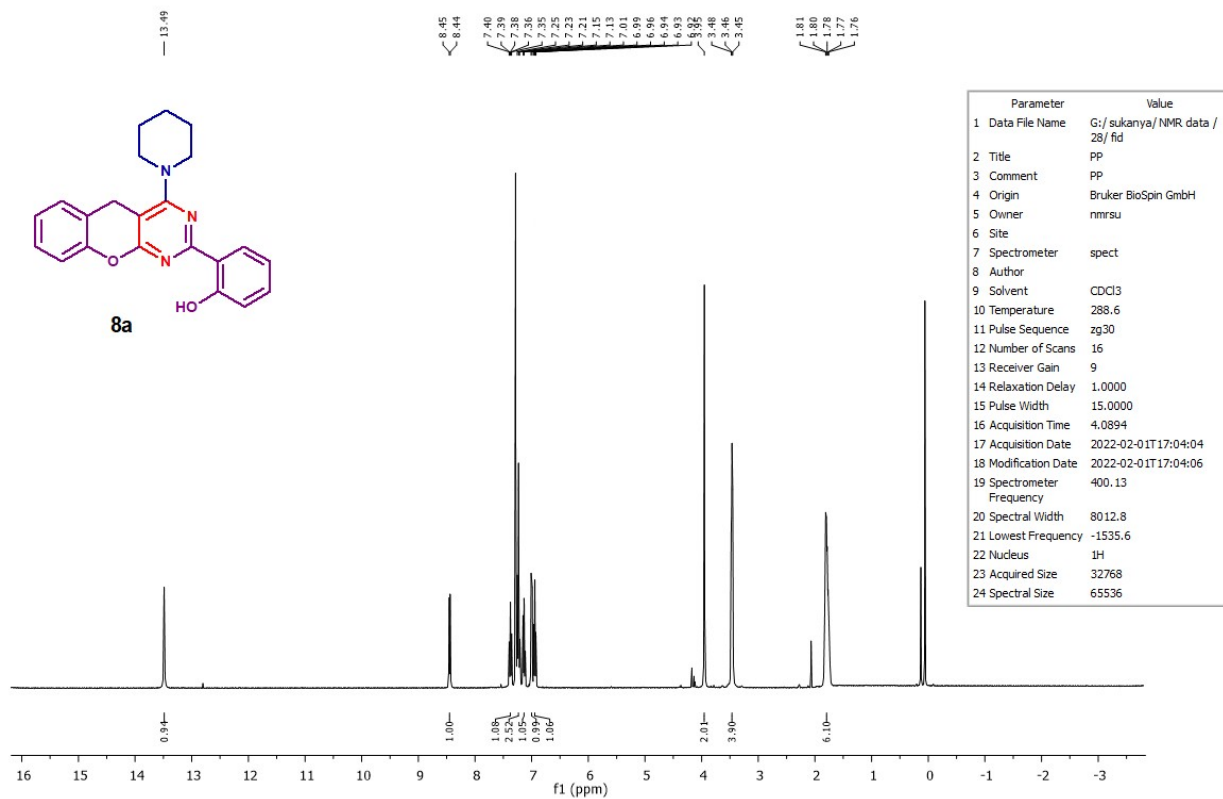

<sup>1</sup>H NMR spectra of product (8a)



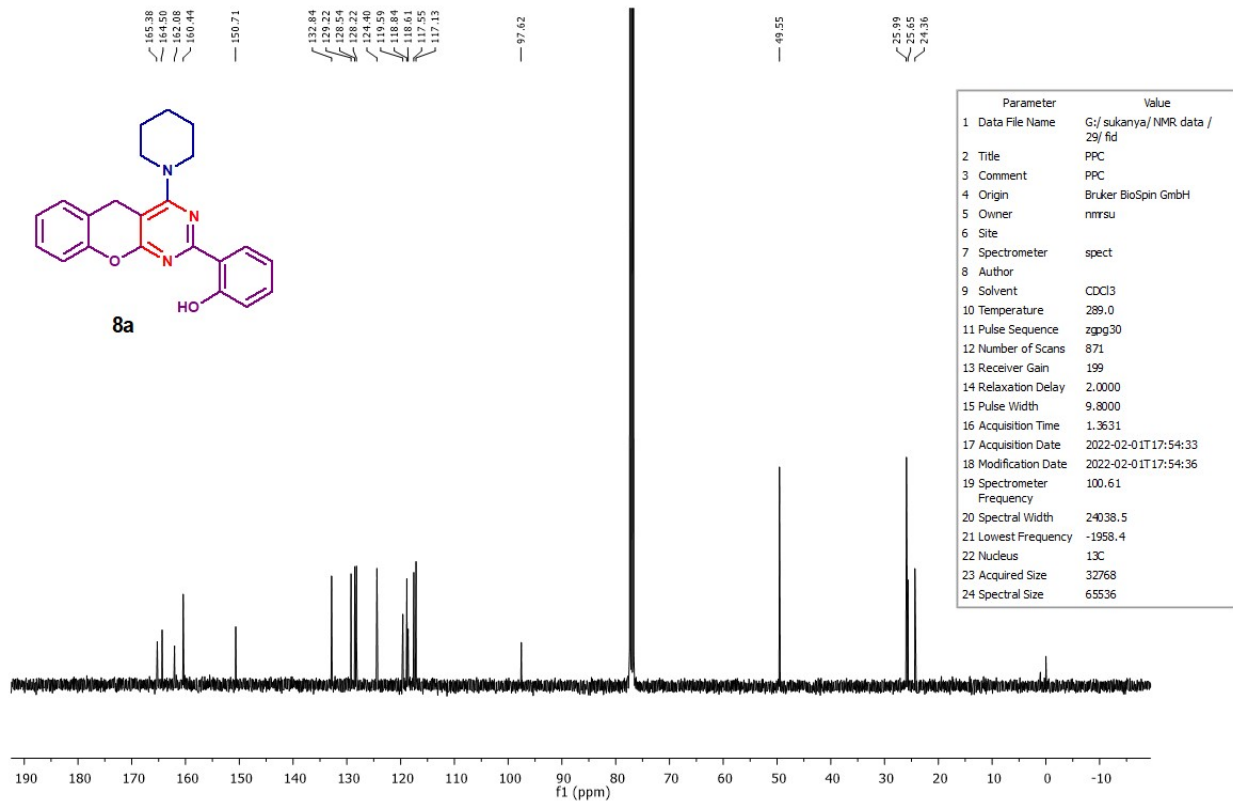

**<sup>13</sup>C NMR spectra of product (8a)**

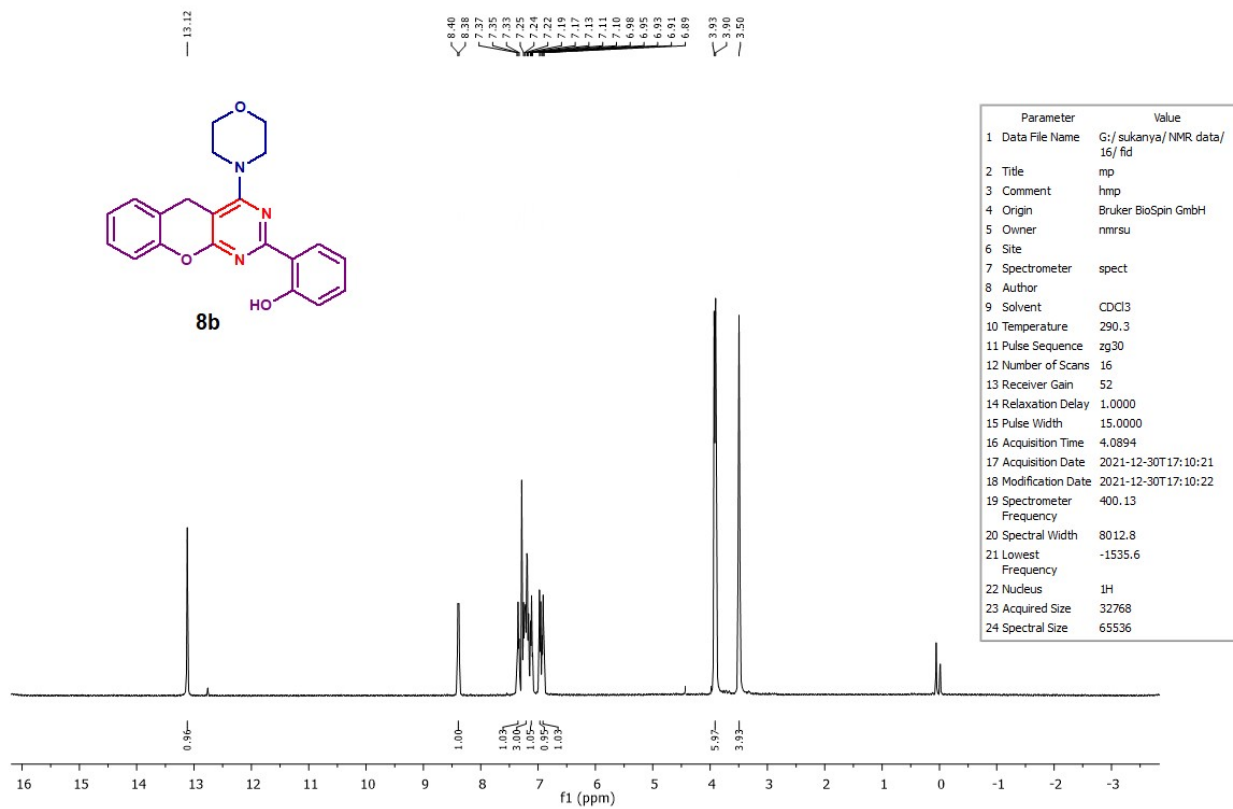

**<sup>1</sup>H NMR spectra of product (8b)**

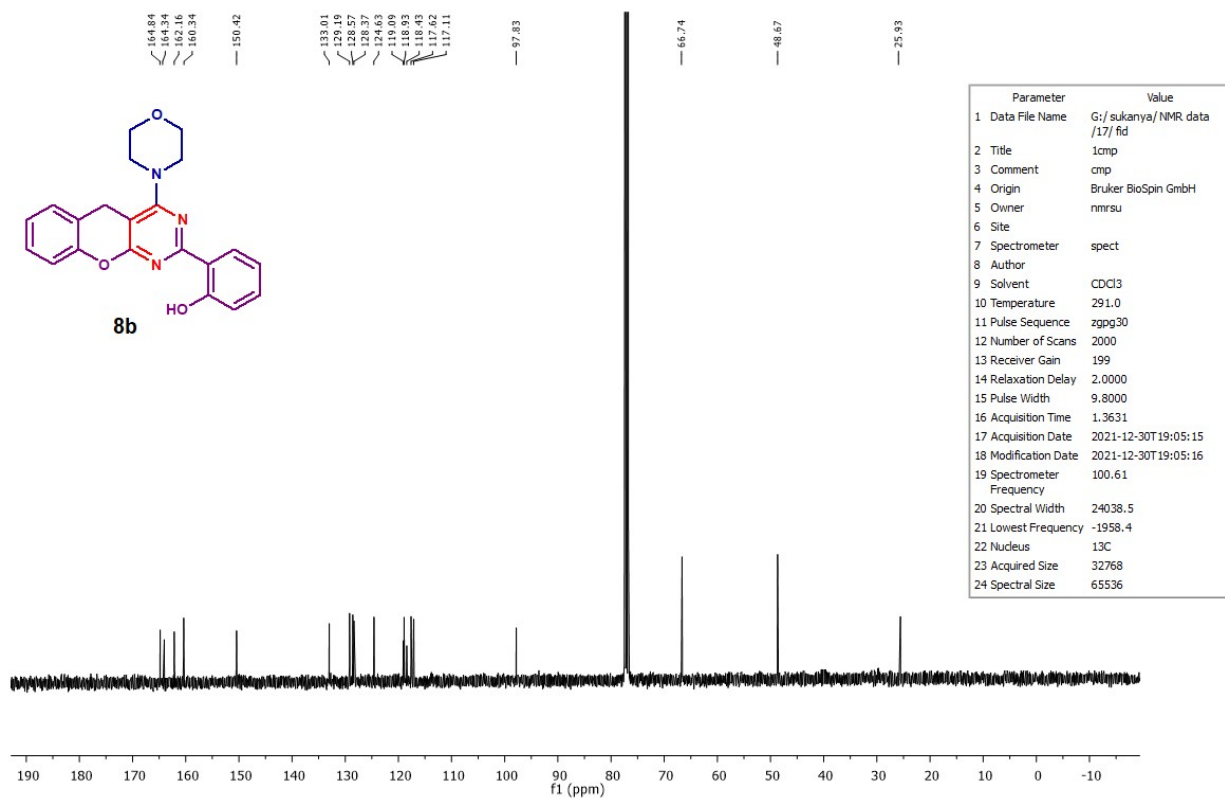

<sup>13</sup>C NMR spectra of product (8b)

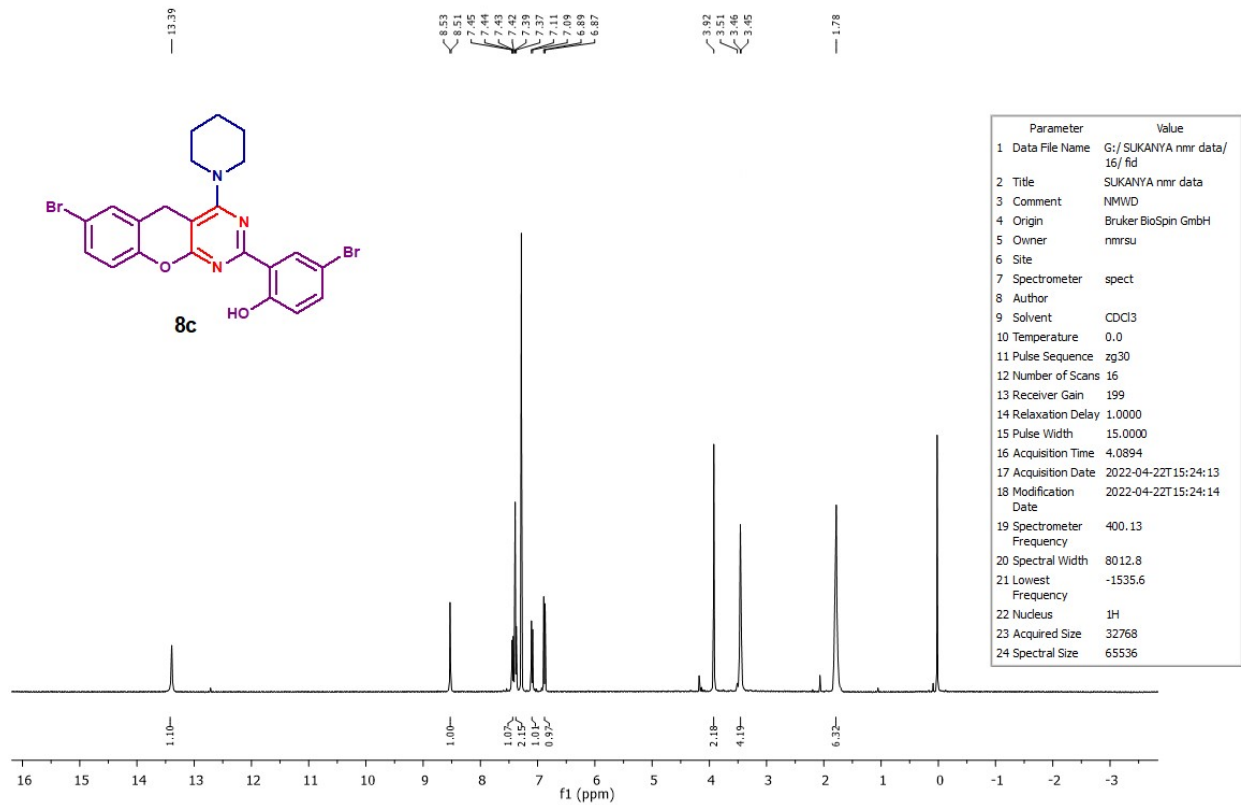

**<sup>1</sup>H NMR spectra of product (8c)**

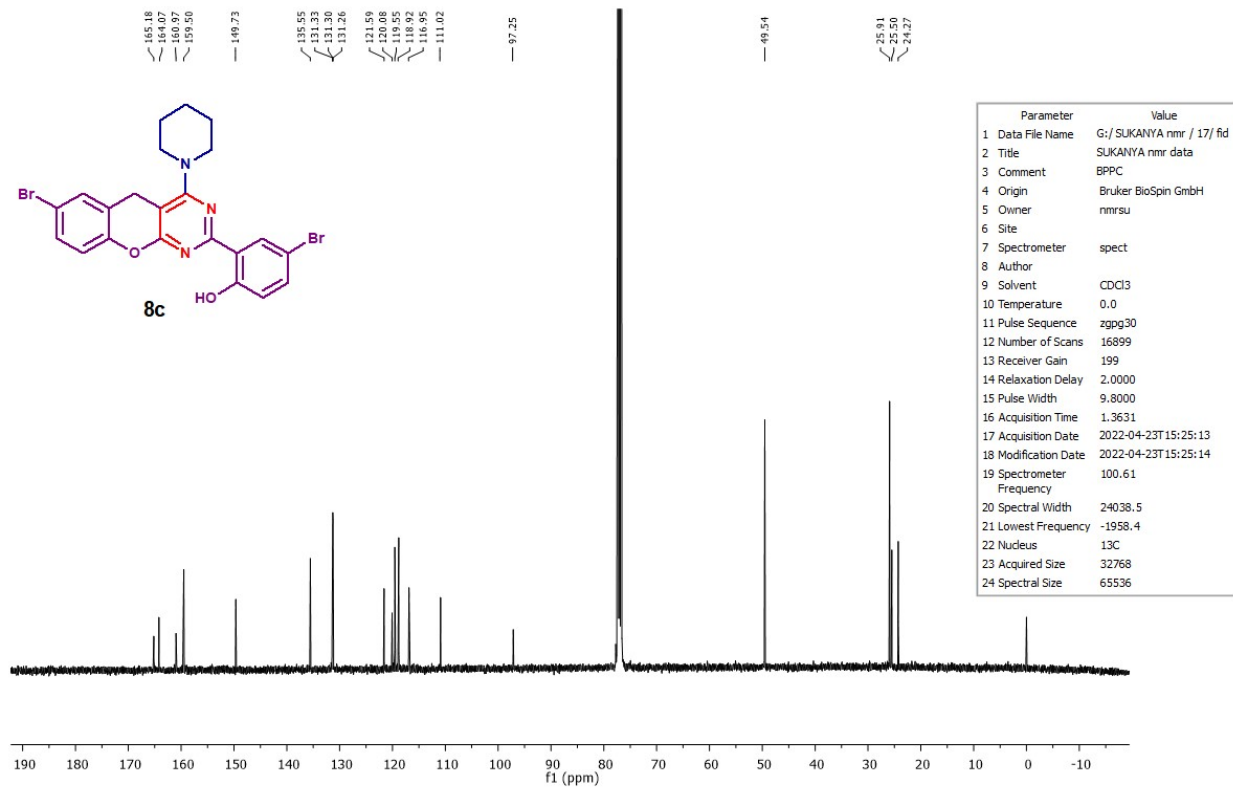

**<sup>13</sup>C NMR spectra of product (8c)**

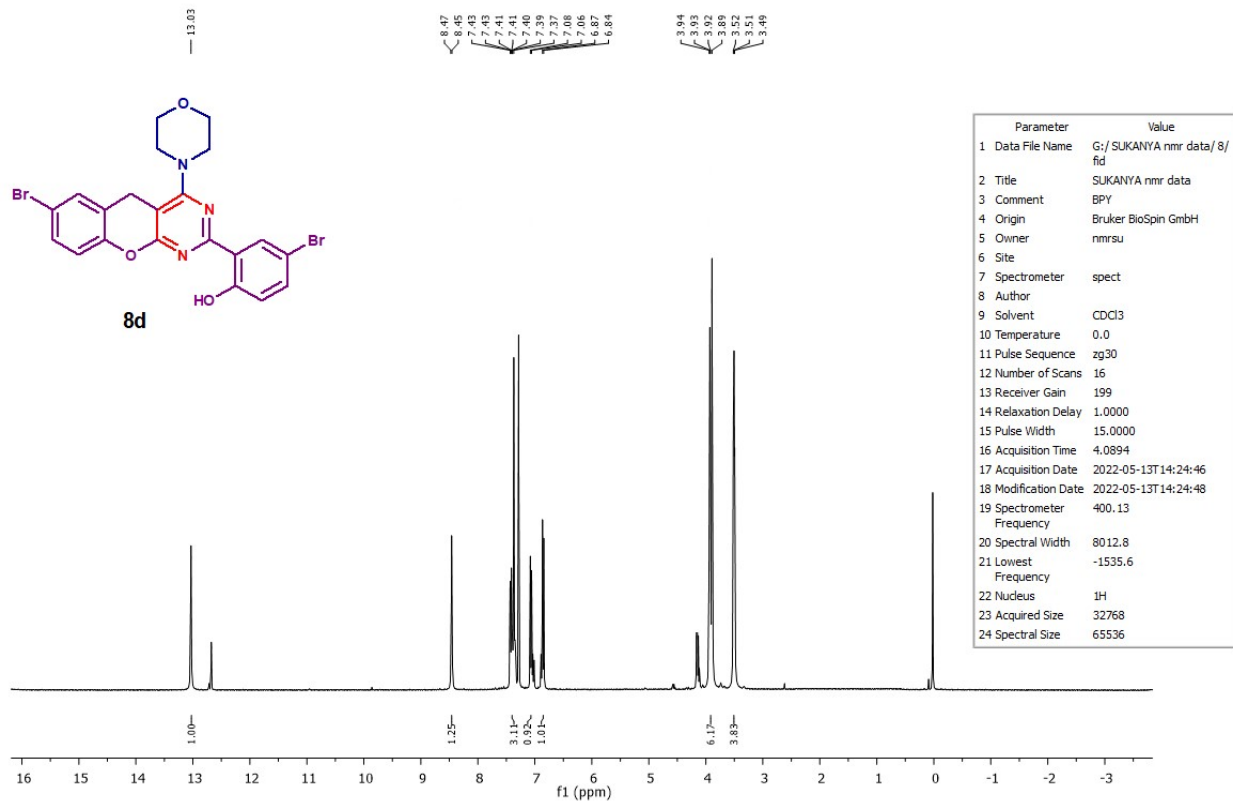

**<sup>1</sup>H NMR spectra of product (8d)**

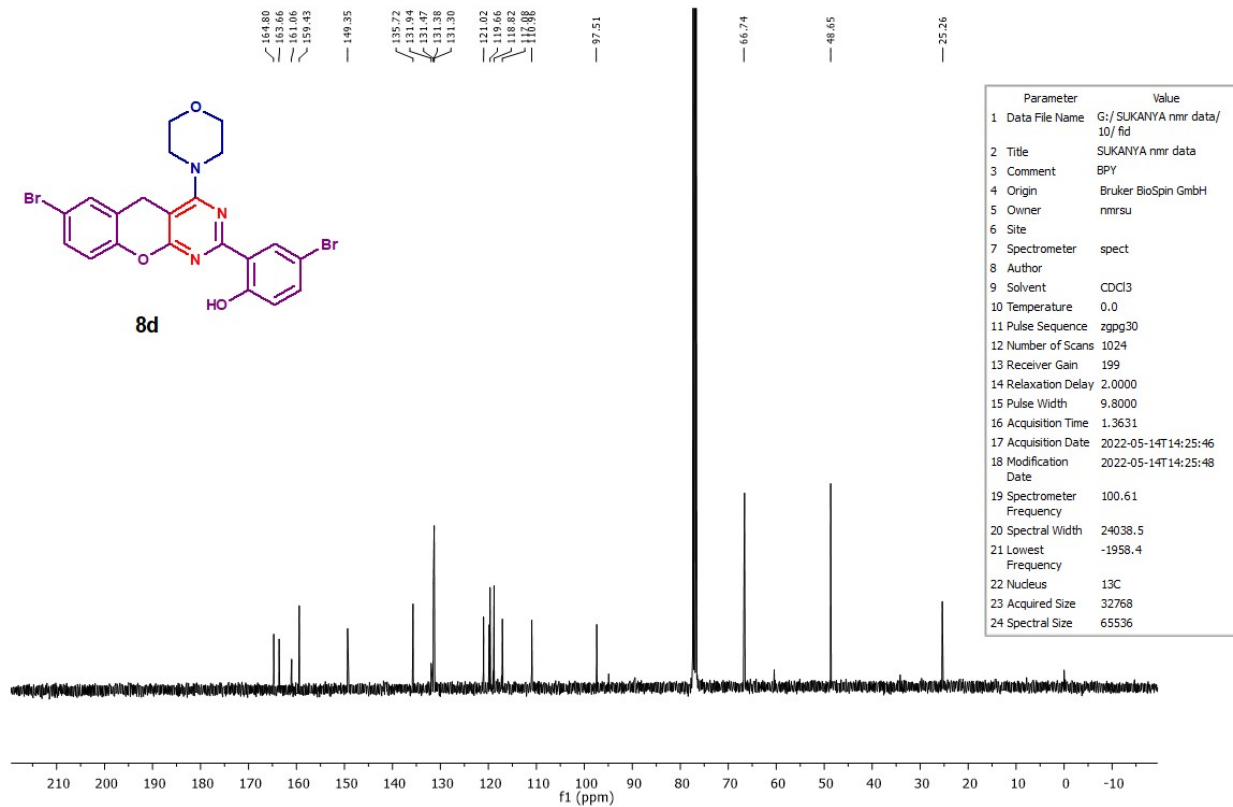

**<sup>13</sup>C NMR spectra of product (8d)**

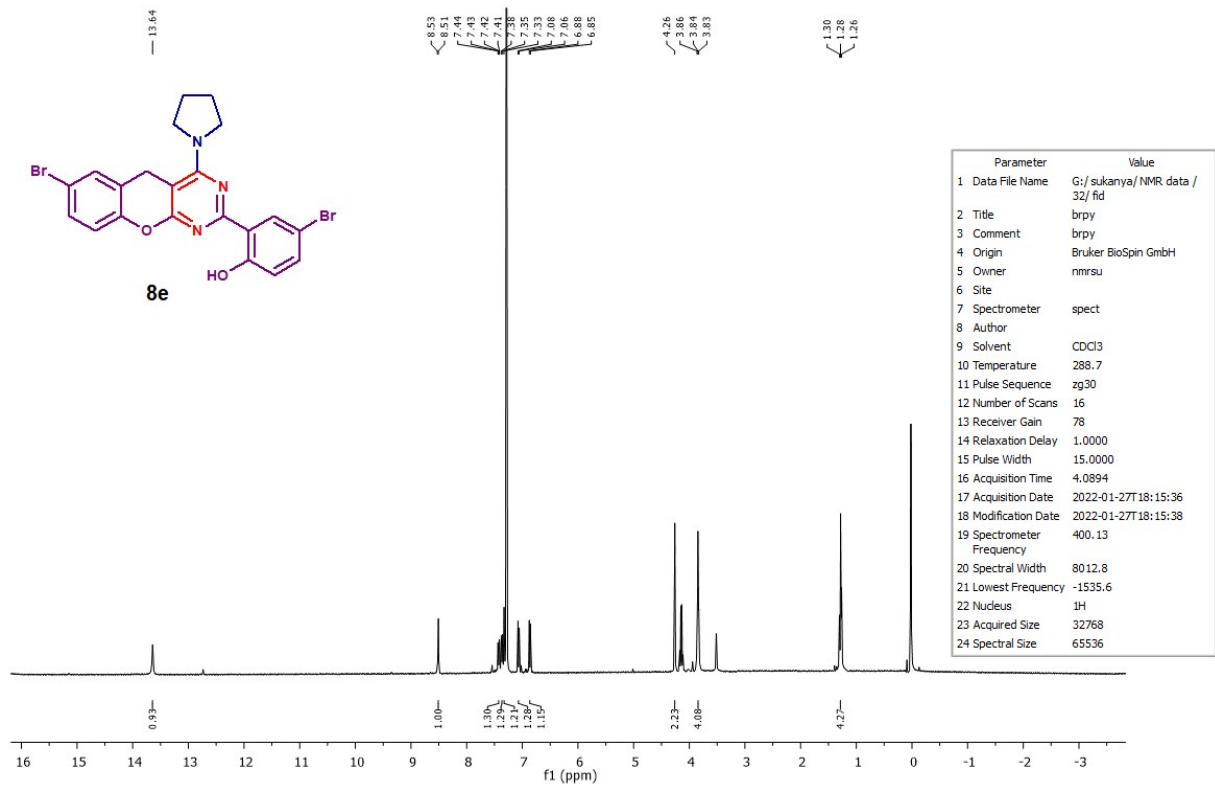

**<sup>1</sup>H NMR spectra of product (8e)**



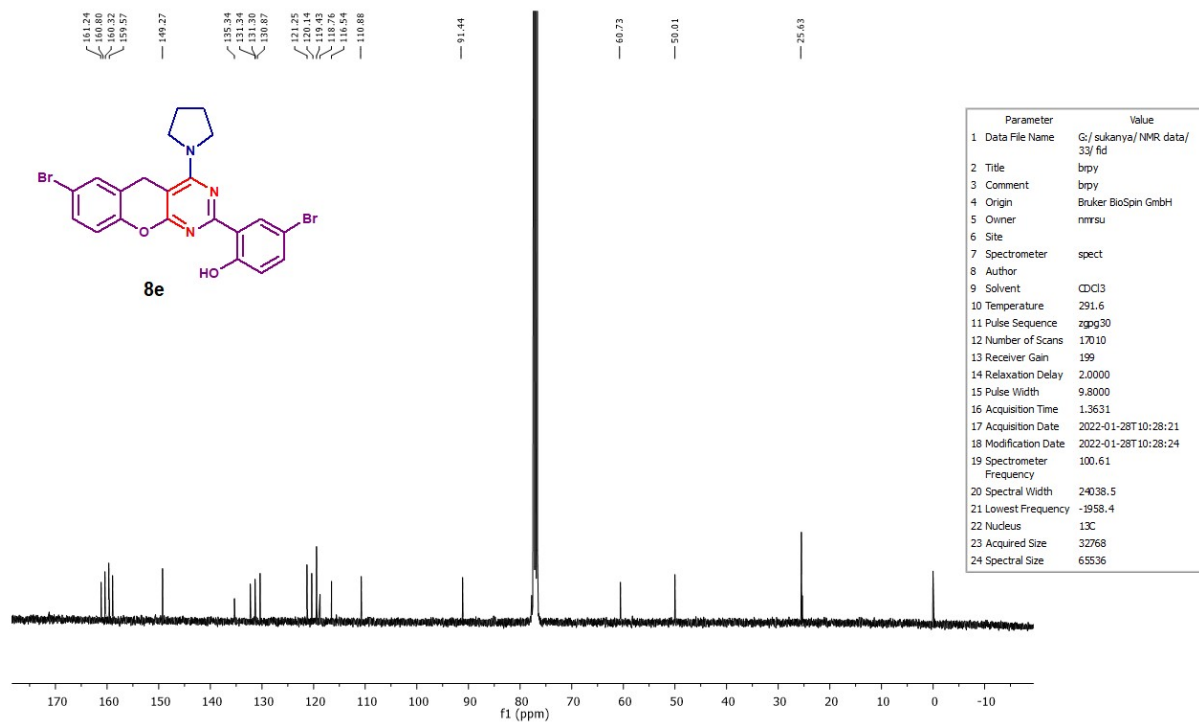

**<sup>13</sup>C NMR spectra of product (8e)**

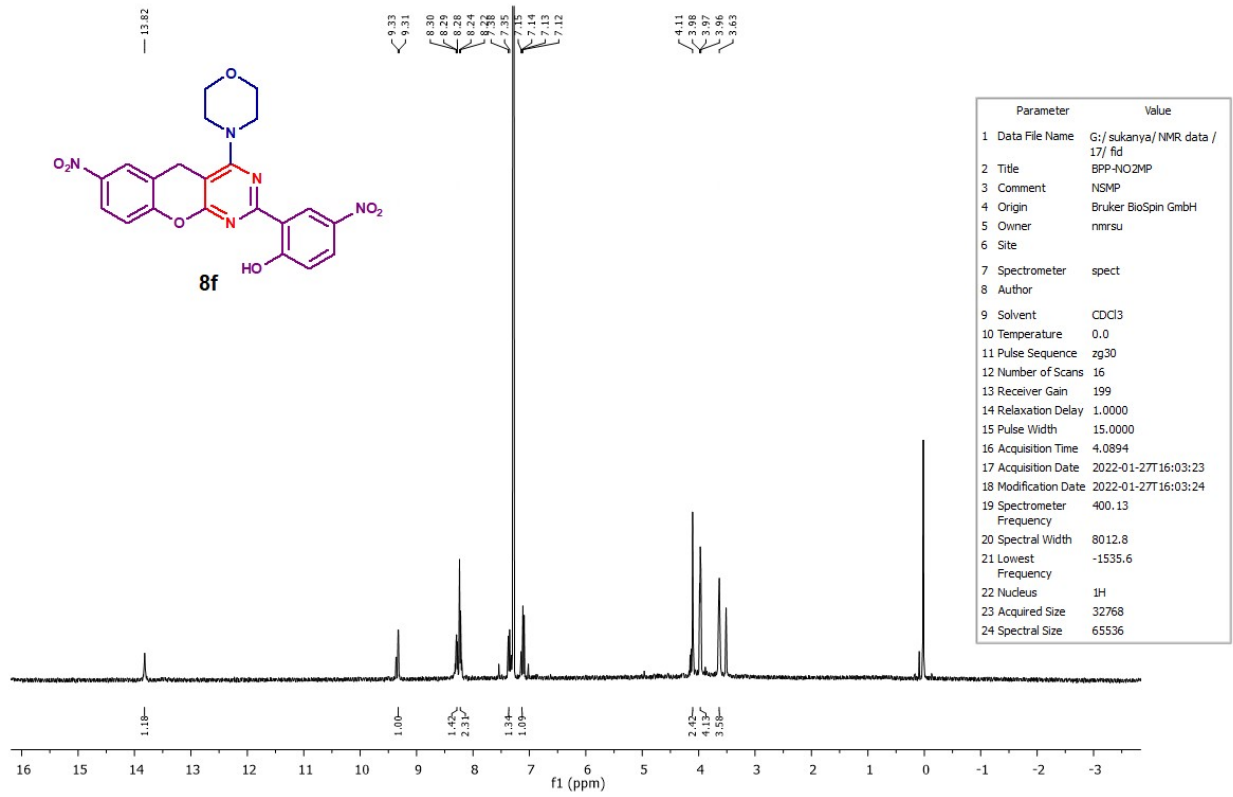

**<sup>1</sup>H NMR spectra of product (8f)**

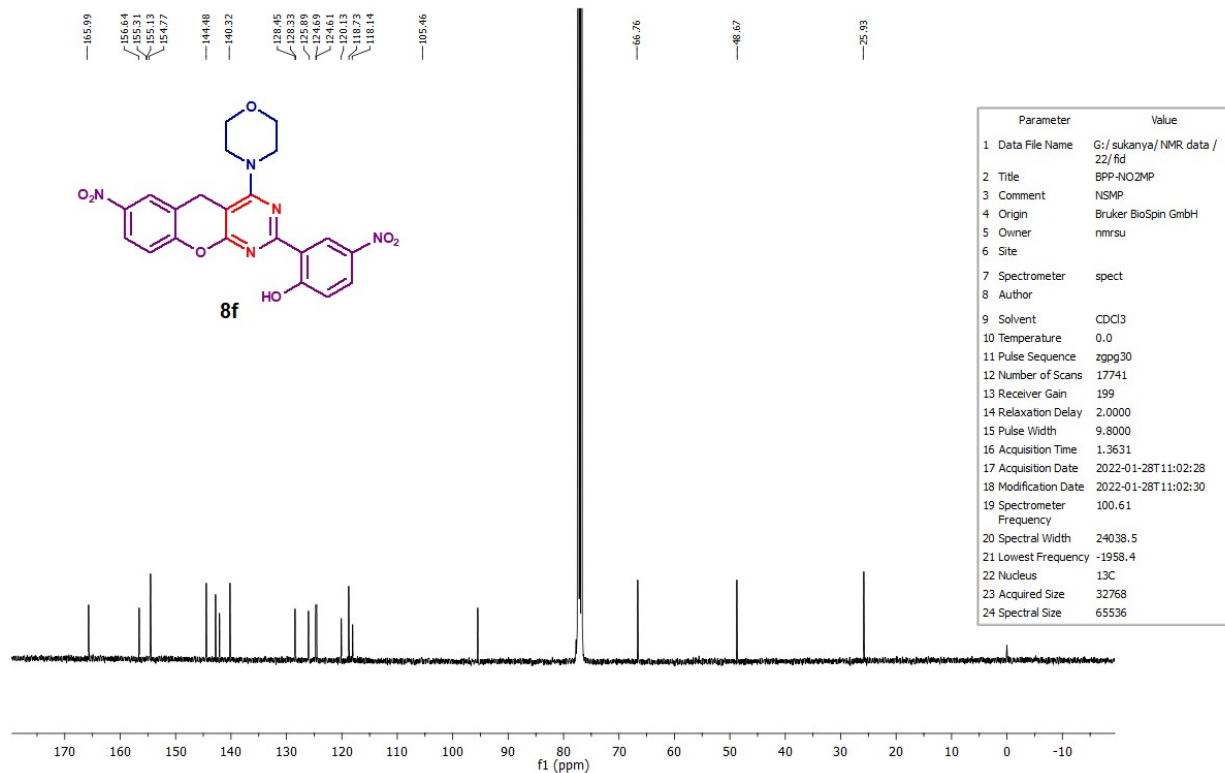

**<sup>13</sup>C NMR spectra of product (8f)**

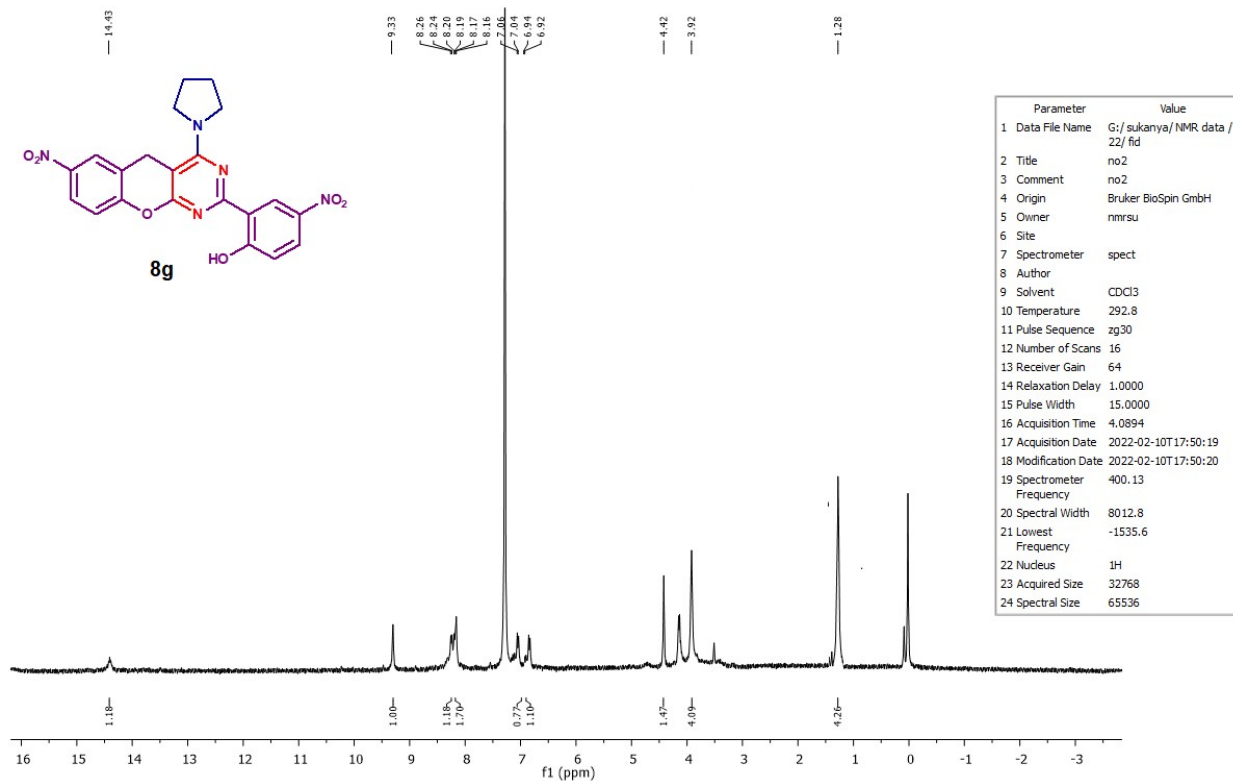

**<sup>1</sup>H NMR spectra of product (8g)**

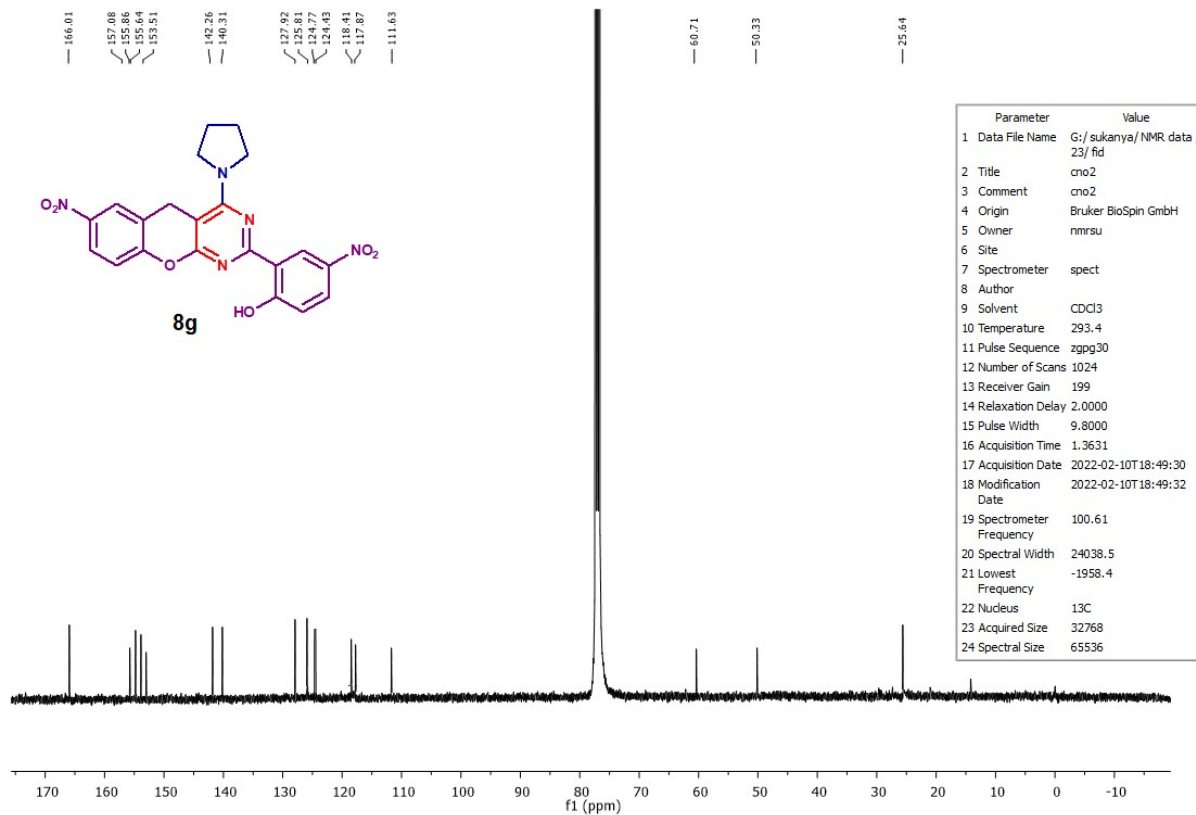

**<sup>13</sup>C NMR spectra of product (8g)**
